# Supplementary material for: Self-assembled coordination thioether silver(I) macrocyclic complexes for homogeneous catalysis
Source: publisher site journal article supplement (doi:10.3762/bjoc.15.239), 2019-10-17
Supplement: Additional file 1 [file 1860-5397-15-239-S1.pdf]

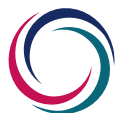

## Supporting Information

for

### **Self-assembled coordination thioether silver(I) macrocyclic complexes for homogeneous catalysis**

Zhen Cao, Aline Lacoudre, Cybille Rossy and Brigitte Bibal

*Beilstein J. Org. Chem.* **2019**, *15*, 2465–2472. doi:10.3762/bjoc.15.239

### **Synthesis and characterization data of ligand and silver complexes, details of X-ray structures**

# Self-Assembled Coordination Thioether Silver(I) Macrocycles for Homogeneous Catalysis

Z. Cao, A. Lacoudre, C. Rossy, B. Bibal

## Contents

|                                                          |     |
|----------------------------------------------------------|-----|
| General information                                      | S2  |
| Synthesis of ligand <i>syn</i> - <b>1</b>                | S4  |
| Synthesis of silver(I) complexes <b>1a–d</b>             | S5  |
| Details of X-ray structures                              | S9  |
| Photophysical property of ligand and silver(I) complexes | S15 |
| <sup>1</sup> H NMR study                                 | S18 |
| Silver catalysis                                         | S27 |
| Infrared spectroscopy                                    | S29 |
| NMR spectra                                              | S34 |
| References                                               | S51 |

## General information

Unless specified, all the reactions were performed under argon atmosphere. All commercially available reagents were used without further purifications: AgOTf (Sigma-Aldrich), triphenylphosphinegold(I) chloride (Sigma-Aldrich), 2-(methylthio)benzene boronic acid (Alfa Aesar), 9,10-dibromoanthracene (TCI). Dichloromethane was purified and dried according to standard methods prior to use.

Silver trifluoroacetate<sup>[1]</sup> and triphenylphosphinesilver triflate<sup>[2]</sup> were prepared according to the literature.

For the assignment of NMR signals, the following abbreviations were employed: 'br' for broad peaks, 'm' for multiple peaks, 'd' for doublet, 't' for triplet, 'q' for quartet, 'dd' for double doublet. The protons belonging to the anthracene core were named 'Anthr-H' meanwhile those of the 9,10-phenyl substituents were coined 'Benz-H'.

The UV-vis spectroscopy was proceeded on a VARIAN 5000 UV-vis-NIR spectrophotometer and the fluorescence emission spectra were done using a Fluoromax-4 spectrofluorometer. The infrared spectroscopy was acquired using a spectrum 100 FT-IR spectrometer.

Crystallographic data of complexes **1a–d** were acquired at CESAMO (UMR 5255) on a Bruker APEX 2 DUO. A single crystal was mounted and immersed in a stream of nitrogen gas [ $T = 150(2)$  K]. Data were collected, using a micro-focus sealed tube of Mo  $K\alpha$  radiation ( $k = 0.71073$  Å) on a KappaCCD diffractometer. Data collection and cell refinement were performed using APEX2 2013.10-0 (Bruker AXS Inc.), and SAINT v8.34A (Bruker AXS Inc.). Data reduction was performed using SAINT v8.34A (Bruker AXS Inc.). Correction for absorption was performed using multi-scan integration as included in SADABS V2012/1 (Bruker AXS). Structure solutions were found by charge flipping methods SUPERFLIP<sup>[3a]</sup> EDMA<sup>[3b]</sup> and refined with SHELXL<sup>[3c]</sup>

Crystallographic data of compound **1** were collected at Biophysical and Structural Chemistry platform (BPCS) at IECB, CNRS UMS3033, Inserm US001, Bordeaux University, with a FR-X Rigaku diffractometer with rotating anode and monochromatic Cu- $K\alpha$  radiation ( $\lambda = 1.54187$  Å) and a Dectris Pilatus 200K detector or a R-Axis Rapid Rigaku MSC diffractometer with monochromatic Cu  $K\alpha$  radiation ( $\lambda = 1.54187$  Å) and a

curved image plate detector. The unit cell determination and data reduction were performed using the Crystal Clear program suite<sup>[4a]</sup> on the full set of data. The structure was solved by direct methods and refined using Shelx suite of programs<sup>[3c]</sup> in the integrated WinGX system<sup>[4b]</sup>. The positions of the H atoms were deduced from coordinates of the non-H atoms and confirmed by Fourier synthesis. The non-H atoms were refined with anisotropic temperature parameters. H atoms were included for structure factor calculations but not refined.

Figures were obtained using Mercury software<sup>[4c]</sup>. Crystallographic data have been deposited at the Cambridge Crystallographic Data Centre.

## Synthesis of Ligand *syn* **1**

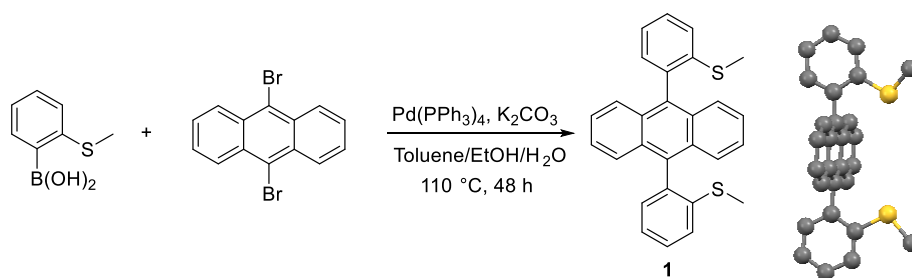

A Schlenk tube was charged with 2-(methylthio)benzeneboronic acid (150 mg, 0.89 mmol), 9,10-dibromoanthracene (120 mg, 0.36 mmol), tetrakis(triphenylphosphine)palladium (21 mg, 5 mol %) and potassium carbonate (248 mg, 1.8 mmol). The mixture was degassed and flushed with argon for three times. Then the degassed solvent toluene/ethanol/water (6 mL, 4:1:1) was added. The resulting mixture was stirred at  $110\text{ }^\circ\text{C}$  for 48 h. After cooling to room temperature, the suspension was filtered through a pad of celite and washed with dichloromethane. The filtrate was dried over magnesium sulfate, then concentrated and purified by column chromatography on silica gel (eluent: petrol ether/ ethyl acetate, 75: 1) to afford *syn*-atropisomer **1** as a light yellow solid (180 mg, 26% yield).

M. p.  $252\text{ }^\circ\text{C}$ ; FTIR (KBr):  $\tilde{\nu} = 3426, 3049, 2916, 1583, 1468, 1434, 1383, 1269, 1256, 1163, 1070, 1023, 967, 941, 767, 752, 698, 661, 610\text{ cm}^{-1}$

$^1\text{H}$  NMR (300 MHz,  $\text{CDCl}_3$ )  $\delta$  7.52-7.59 (m, 6H, Anthr-H and Benz-H), 7.44 (d,  $J = 7.6\text{ Hz}$ , 2H, Benz-H), 7.31-7.40 (m, 8H, Anthr-H and Benz-H), 2.25 (m, 6H,  $\text{SCH}_3$ ).

$^{13}\text{C}$  NMR (75 MHz,  $\text{CDCl}_3$ )  $\delta$  140.1, 137.0, 135.3, 131.6, 130.0, 128.6, 121.7, 125.5, 124.6, 15.3

HRMS (FD):  $m/z$  calculated for  $\text{C}_{13}\text{H}_{19}\text{O}_4\text{BrNa}$   $[\text{M}]^{+}$ : 422.1163; found: 422.1180.

The *syn* configuration was confirmed by X-ray diffraction on a monocrystal obtained by the diffusion of hexane into a solution of **1** (3 mg) in dichloromethane (0.3 mL).

## Synthesis of silver complexes **1a–d**

Synthesis of complex **1a** = ((*R,S*)-**1**)<sub>2</sub>·(AgSO<sub>2</sub>CF<sub>3</sub>)<sub>2</sub>

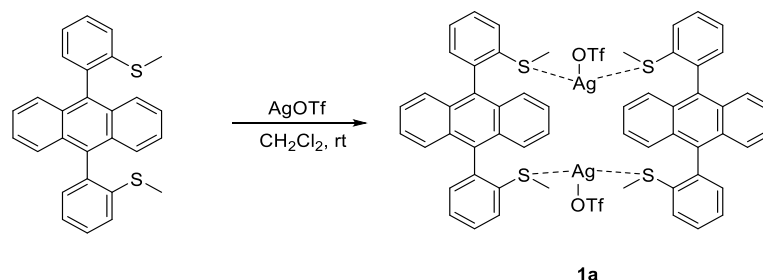

To a solution of *syn*-**1** (15 mg, 0.0355 mol) in dichloromethane (1 mL) was added silver trifluoromethanesulfonate (9.1 mg, 0.0355 mmol) under argon atmosphere at room temperature. The mixture was stirred at room temperature for 4 h. Then the solution was concentrated to ca. 0.3 mL and diethyl ether (2 mL) was added to afford a white precipitate. The solid was filtered, washed with diethyl ether and dried under reduced pressure to afford product **1a** (22 mg, 92% yield).

M. p. 246 °C; FTIR (KBr):  $\tilde{\nu}$  = 3440, 3057, 2927, 1620, 1474, 1437, 1383, 1279, 1243, 1221, 1162, 1026, 773, 753, 635 cm<sup>-1</sup>

<sup>1</sup>H NMR (300 MHz, CDCl<sub>3</sub>)  $\delta$  7.86 (d, *J* = 7.9 Hz, 4H, Benz-H), 7.73 (td, *J* = 7.4, 1.5 Hz, 4H, Benz-H), 7.65 (td, *J* = 7.4, 1.2 Hz, 4H, Benz-H), 7.52–7.58 (m, 12H, Anthr-H and Benz-H), 7.36–7.42 (m, 8H, Anthr-H) 2.38 (s, 12H, SCH<sub>3</sub>).

<sup>13</sup>C NMR (75 MHz, CDCl<sub>3</sub>)  $\delta$  138.3, 134.4, 133.4, 131.7, 130.6, 130.1, 129.6, 128.6, 126.9, 125.4, 20.4.

<sup>19</sup>F NMR (282 MHz, CDCl<sub>3</sub>)  $\delta$  (ppm) -77.4.

Monocrystals (needles) were obtained by the slow diffusion of hexane into a solution of complex **1a** (1.5 mg) in CH<sub>2</sub>Cl<sub>2</sub> (0.2 mL). Two different crystal structures ((*R,S*)-**1**)<sub>2</sub>·(AgSO<sub>2</sub>CF<sub>3</sub>)<sub>2</sub> involving the coordination of different asymmetric sulfur atoms on silver(I) were obtained:

- the two sulfur atoms coordinated to silver(I) presented the same configuration (either (*R*) or (*S*)). The two ligands **1** are facing head-to-head (Fig. S1a);
- the two sulfur atoms coordinated to silver(I) presented a (*R*) and a (*S*) configuration, respectively. The two ligands **1** are placed in a head-to-tail way (Fig. S1b)

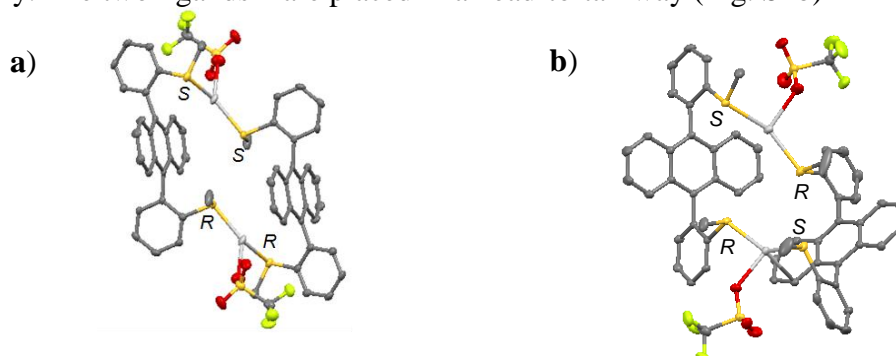

**Figure S1.** Different diastereoisomeric structures of macrocyclic complex [(*R,S*)-**1**]<sub>2</sub>·(AgSO<sub>2</sub>CF<sub>3</sub>)<sub>2</sub>: **a)** Ligands are placed in a head-to-head fashion, with two (*R*) or two (*S*) stereogenic sulfur atoms coordinated to each silver(I). This macrocycle possesses a center of symmetry; **b)** Ligands are placed in a head-to-tail way, with one (*R*) and one (*S*) stereogenic sulfur atoms coordinated to each silver(I); this macrocycle has a center of symmetry.

Synthesis of complex **1b** = (**1**)<sub>2</sub>·(AgCO<sub>2</sub>CF<sub>3</sub>)<sub>2</sub>

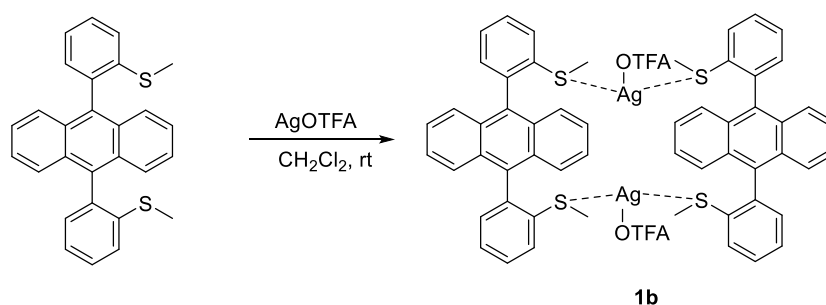

To a solution of *syn*-**1** (6 mg, 0.014 mol) in dichloromethane (1 mL) was added silver trifluoroacetate (3.1 mg, 0.014 mmol) under argon atmosphere at room temperature. The mixture was stirred at ambient temperature for 4 h. Then the solution was concentrated to *ca.* 0.2 mL and diethyl ether (2 mL) was added. A light yellow solid was formed after 5 min. The precipitate was filtered, washed with diethyl ether and dried under reduced pressure to afford complex **1b** (7 mg, 78% yield).

M. p. 235 °C; FTIR (KBr):  $\tilde{\nu}$  = 3426, 3052, 2919, 1620, 1473, 1434, 1384, 1299, 772, 754, 664 cm<sup>-1</sup>

<sup>1</sup>H NMR (300 MHz, CDCl<sub>3</sub>)  $\delta$  7.61-7.67 (m, 4H, Benz-H), 7.55-7.59 (m, 8H, Anthr-H), 7.45-7.55 (m, 12H, Benz-H), 7.36-7.41 (m, 8H, Anthr-H), 2.40 (s, 12H, SCH<sub>3</sub>).

<sup>13</sup>C NMR (75 MHz, CDCl<sub>3</sub>)  $\delta$  137.2, 136.5, 134.6, 131.7, 130.1, 129.8, 129.3, 126.6, 126.5, 125.8, 125.7, 17.1.

<sup>19</sup>F NMR (282 MHz, CDCl<sub>3</sub>)  $\delta$  -73.7 ppm.

Synthesis of complex **1c** = [(*R,S*-**1**)<sub>4</sub>·(AgNO<sub>3</sub>)<sub>6</sub>]

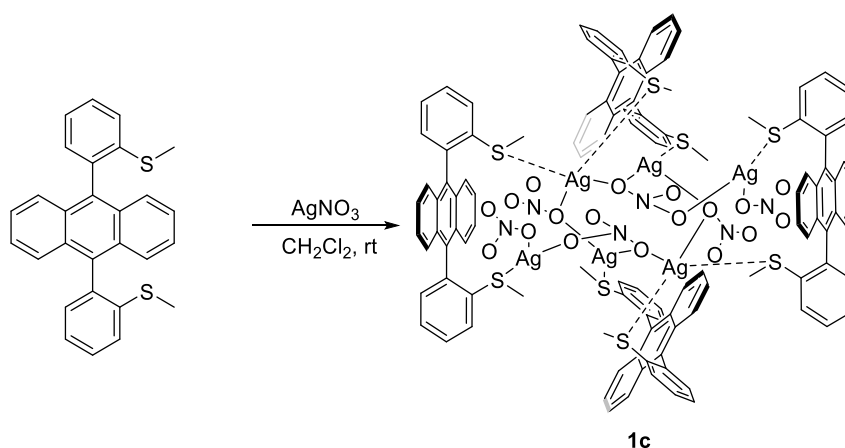

To a solution of *syn*-**1** (6 mg, 0.014 mol) in dichloromethane (1 mL) was added silver nitrate (2.4 mg, 0.014 mmol) under argon atmosphere at room temperature. The mixture was stirred at ambient temperature for 4 h. Then the solution was concentrated to ca. 0.2 mL and diethyl ether (2 mL) was added to get a white precipitate. The solid was filtered, washed with diethyl ether and dried under reduced pressure to afford complex **1c** (5.1 mg, 80% yield).

M. p. 247.3 °C; FTIR (KBr):  $\tilde{\nu}$  = 3428, 3052, 2919, 1620, 1473, 1434, 1384, 1300, 772, 754, 664 cm<sup>-1</sup>

<sup>1</sup>H NMR (300 MHz, CDCl<sub>3</sub>)  $\delta$  7.63-7.69 (m, 8H, Benz-H), 7.47-7.63 (m, 40H, Anthr-H and Benz-H), 7.39-7.42 (m, 16H, Anthr-H), 2.37 (s, 24H, SCH<sub>3</sub>).

<sup>13</sup>C NMR (75 MHz, CDCl<sub>3</sub>)  $\delta$  137.5, 135.3, 134.6, 131.7, 129.6 (d, *J* = 2.6 Hz), 127.4, 127.2, 126.7, 125.5, 18.4.

White needle monocystals were grown by hexane diffusion into a solution of complex **1c** (2 mg) in CH<sub>2</sub>Cl<sub>2</sub> (0.3 mL)

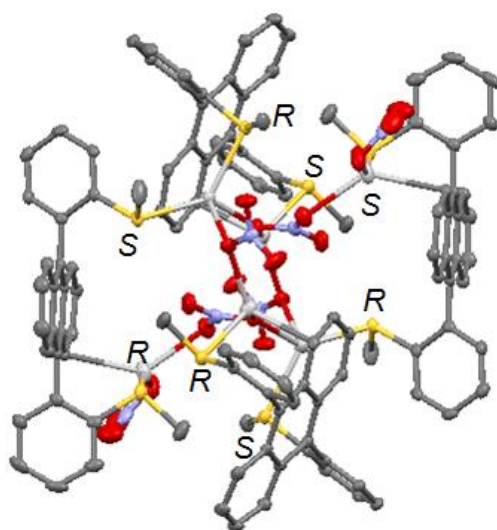

**Figure S2.** Solid-state structure of complex **1c** (M<sub>6</sub>L<sub>4</sub>), with *syn* (*R,S*)-*syn* **1** ligands.



Synthesis of complex **1d** = (**1**).( $\text{AgSO}_2\text{CF}_3\text{PPh}_3$ )<sub>2</sub>

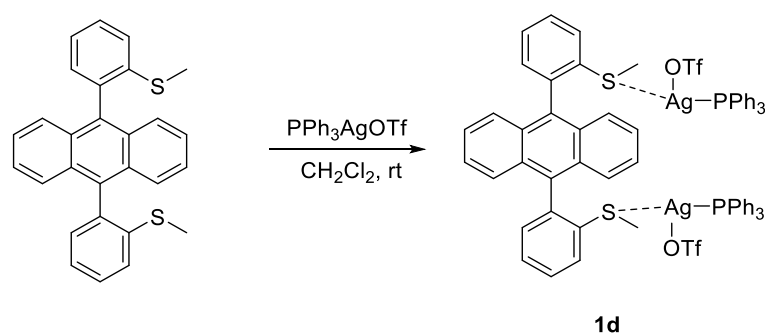

To a solution of *syn*-**1** (6 mg, 0.014 mol) in dichloromethane (1 mL) was added triphenylphosphinesilver trifluoromethanesulfonate (7.4 mg, 0.014 mmol) under argon atmosphere at room temperature. The mixture was stirred at ambient temperature for 4 h. Then the solution was concentrated to *ca.* 0.2 mL and diethyl ether (2 mL) was added to get a white precipitate. The solid was filtered, washed with diethyl ether and dried under reduced pressure to afford complex **1d** as a light yellow powder (8 mg, 77% yield).

M. p. 125.8 °C; FTIR (KBr):  $\tilde{\nu}$  = 3441, 3055, 2929, 1587, 1480, 1436, 1289, 1235, 1220, 1162, 1026, 779, 753, 694, 635, 516, 504  $\text{cm}^{-1}$ ;

$^1\text{H}$  NMR (300 MHz,  $\text{CDCl}_3$ )  $\delta$  7.64-7.69 (m, 4H, Benz-H), 7.51-7.61 (m, 6H, Anthr-H and Benz-H), 7.42-7.48 (m, 8H, Anthr-H and Benz-H and  $\text{PPh}_3$ ), 7.29-7.39 (m, 28H,  $\text{PPh}_3$ ), 2.34 (s, 6H,  $\text{SCH}_3$ )

$^{13}\text{C}$  NMR (75 MHz,  $\text{CDCl}_3$ )  $\delta$  137.4, 137.2, 135.4, 134.7, 133.9, 131.6, 131.1, 129.7, 129.3, 127.9, 127.1, 126.5, 125.6, 18.3

$^{19}\text{F}$  NMR (282 MHz,  $\text{CDCl}_3$ )  $\delta$  -77.4 ppm

$^{31}\text{P}$  NMR (94 MHz,  $\text{CDCl}_3$ )  $\delta$  14.9 (bs) ppm.

Yellow monocystals were grown from hexane diffusion into a solution of complex **1d** (1 mg) in  $\text{CH}_2\text{Cl}_2$  (0.2 mL)

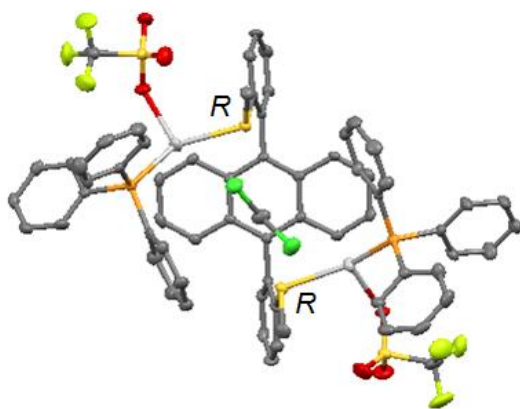

**Figure S3.** Solid-state structure of complex **1d** ( $\text{M}_2\text{L}$ ), observed as a racemic mixture (*R,R*) and (*S,S*) complexes

**Table S1.** Selected lengths (Å) and angles (°) for X-ray structures of **1**, **1a** (two diastereoisomeric crystals), **1c** and **1d**.

|                                                                                   | <b>1</b>                                                                                            | <b>1a</b> (head-to-head)                                                                                  | <b>1a</b> (head-to-tail)                                                                    | <b>1c</b>                                                                                | <b>1d</b>                                  |
|-----------------------------------------------------------------------------------|-----------------------------------------------------------------------------------------------------|-----------------------------------------------------------------------------------------------------------|---------------------------------------------------------------------------------------------|------------------------------------------------------------------------------------------|--------------------------------------------|
| S...Ag <sup>+</sup>                                                               | -                                                                                                   | Ag2-S4 2.509,<br>Ag2-S5 2.456                                                                             | Ag1-S1 2.478,<br>Ag1-S3 2.532,<br>Ag2-S4 2.563,<br>Ag2-S5 2.601                             | Ag1-S1(S3) 2.570,<br>Ag2-S2 2.608,<br>Ag3-S4 2.502                                       | Ag1-S1 2.514,<br>Ag2-S3 2.521              |
| P...Ag <sup>+</sup>                                                               | -                                                                                                   | -                                                                                                         | -                                                                                           | -                                                                                        | Ag1-P1 2.396,<br>Ag2-P2 2.401              |
| <SAgS>                                                                            | -                                                                                                   | S1-Ag1-S2 147.0<br>S4-Ag2-S5 136.1                                                                        | S1-Ag1-S3 133.7<br>S4-Ag2-S5 148.8                                                          | S1-Ag1-S3 131.5                                                                          | -                                          |
| <PAgS>                                                                            | -                                                                                                   | -                                                                                                         | -                                                                                           | -                                                                                        | P1-Ag1-S1 138.0,<br>P2-Ag2-S3 140.6        |
| Dihedral angles<br>between the<br>anthracene and<br>its 9,10 aryl<br>substituents | C20-C15-C1-C14<br>100.0<br>C28-C23-C8-C7 90.9<br>C58-C53-C38-C37<br>93.4<br>C50-C45-C31-C44<br>87.6 | C20-C15-C7-C6 98.4<br>C23-C24-C14-C13 83.5<br>C120-C115-C107-C106<br>104.5<br>C123-C128-C14-C113<br>100.5 | C20-C15-C13-C12 92.9<br>C27-C22-C6-C5 84.0<br>C55-C50-C32-C33 106.1<br>C48-C43-C39-C40 86.3 | C2-C7-C8-C9 81.6<br>C27-C22-C15-C16 95.0<br>C30-C35-C36-C49 70.8<br>C55-C50-C43-C42 82.6 | C16-C15-C13-C12 76.3<br>C26-C21-C6-C5 82.7 |

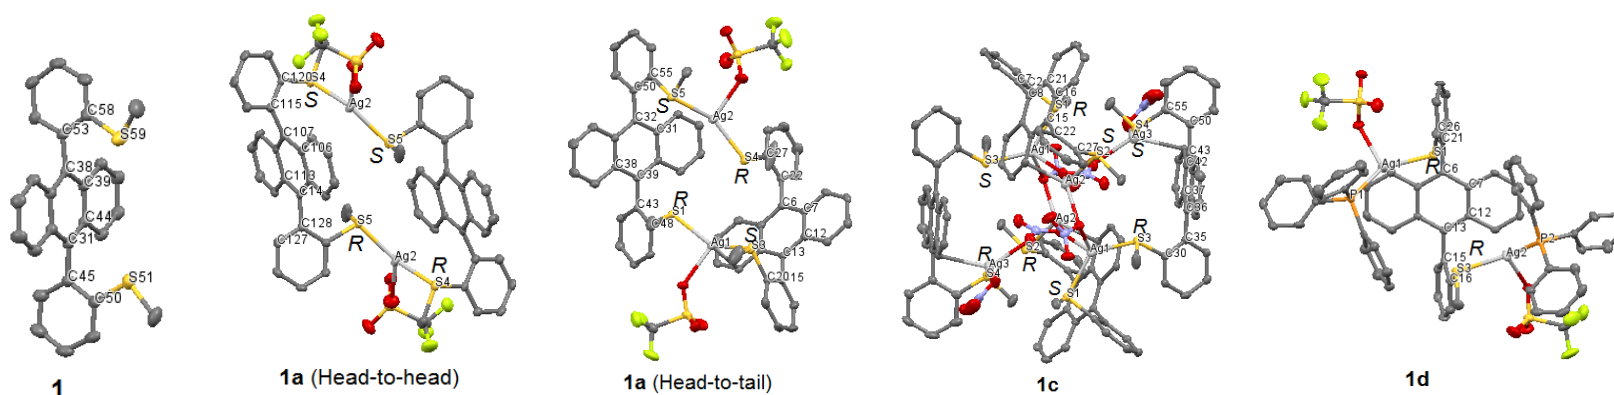

**Table S2.** Crystal data and structure refinement for ligand *syn-1*

|                                   |                                                |                 |
|-----------------------------------|------------------------------------------------|-----------------|
| CCDC number                       | 1883674                                        |                 |
| Empirical formula                 | C <sub>56</sub> H <sub>44</sub> S <sub>4</sub> |                 |
| Formula weight                    | 845.15                                         |                 |
| Temperature                       | 153(2) K                                       |                 |
| Wavelength                        | 1.54187 Å                                      |                 |
| Crystal system                    | Monoclinic                                     |                 |
| Space group                       | P21/c                                          |                 |
| Unit cell dimensions              | a = 20.742(3) Å                                | α = 90°         |
|                                   | b = 8.9984(11) Å                               | β = 91.166(6) ° |
|                                   | c = 23.764(4) Å                                | γ = 90°         |
| Volume                            | 4434.5(11) Å <sup>3</sup>                      |                 |
| Z                                 | 4                                              |                 |
| Density (calculated)              | 1.266 Mg/m <sup>3</sup>                        |                 |
| Absorption coefficient            | 2.250 mm <sup>-1</sup>                         |                 |
| F(000)                            | 1776                                           |                 |
| Crystal size                      | 0.12 x 0.06 x 0.02 mm <sup>3</sup>             |                 |
| Theta range for data collection   | 6.40 to 68.25°.                                |                 |
| Index ranges                      | -24 ≤ h ≤ 24, -10 ≤ k ≤ 10, -28 ≤ l ≤ 27       |                 |
| Reflections collected             | 31983                                          |                 |
| Independent reflections           | 8075 [R(int) = 0.0161]                         |                 |
| Completeness to theta = 68.25°    | 99.5 %                                         |                 |
| Absorption correction             | Semi-empirical from equivalents                |                 |
| Max. and min. transmission        | 0.9564 and 0.7740                              |                 |
| Refinement method                 | Full-matrix least-squares on F <sup>2</sup>    |                 |
| Data / restraints / parameters    | 8075 / 0 / 545                                 |                 |
| Goodness-of-fit on F <sup>2</sup> | 1.039                                          |                 |
| Final R indices [I > 2σ(I)]       | R1 = 0.0385, wR2 = 0.1093                      |                 |
| R indices (all data)              | R1 = 0.0445, wR2 = 0.1134                      |                 |
| Largest diff. peak and hole       | 0.788 and -0.815 e.Å <sup>-3</sup>             |                 |

**Table S3.** Crystal data and structure refinement for silver complex **1a** (Fig 1a, head-to-head coordination of ligands)

|                                   |                                                                                                                                   |
|-----------------------------------|-----------------------------------------------------------------------------------------------------------------------------------|
| CCDC number                       | 1883535                                                                                                                           |
| Empirical formula                 | C <sub>58</sub> H <sub>44</sub> Ag <sub>2</sub> F <sub>6</sub> O <sub>6</sub> S <sub>6</sub>                                      |
| Formula weight                    | 1359.03                                                                                                                           |
| Temperature                       | 150(2) K                                                                                                                          |
| Wavelength                        | 0.71073 Å                                                                                                                         |
| Crystal system                    | Triclinic                                                                                                                         |
| Space group                       | P -1                                                                                                                              |
| Unit cell dimensions              | a = 13.4300(13) Å    alpha = 117.822(2) °<br>b = 14.8251(14) Å    beta = 103.344(2) °<br>c = 15.6390(13) Å    gamma = 92.109(2) ° |
| Volume                            | 2641.4(4) Å <sup>3</sup>                                                                                                          |
| Z                                 | 2                                                                                                                                 |
| Calculated density                | 1.709 Mg/m <sup>-3</sup>                                                                                                          |
| Absorption coefficient            | 1.053 mm <sup>-1</sup>                                                                                                            |
| F(000)                            | 1368                                                                                                                              |
| Crystal size                      | 0.120 x 0.100 x 0.030 mm <sup>3</sup>                                                                                             |
| Theta range for data collection   | 1.534 to 26.381 °                                                                                                                 |
| Limiting indices                  | -16 ≤ h ≤ 16, -18 ≤ k ≤ 18, -18 ≤ l ≤ 19                                                                                          |
| Reflections collected / unique    | 29382 / 10564 [R(int) = 0.0524]                                                                                                   |
| Completeness to theta = 25.242    | 98.1 %                                                                                                                            |
| Absorption correction             | Semi-empirical from equivalents                                                                                                   |
| Refinement method                 | Full-matrix least-squares on F <sup>2</sup>                                                                                       |
| Data / restraints / parameters    | 10564 / 6 / 760                                                                                                                   |
| Goodness-of-fit on F <sup>2</sup> | 1.033                                                                                                                             |
| Final R indices [I > 2sigma(I)]   | R1 = 0.0393, wR2 = 0.0887                                                                                                         |
| R indices (all data)              | R1 = 0.0603, wR2 = 0.0993                                                                                                         |
| Extinction coefficient            | n/a                                                                                                                               |
| Largest diff. peak and hole       | 0.598 and -0.781 e.Å <sup>-3</sup>                                                                                                |

**Table S4.** Crystal data and structure refinement for silver complex **1a** (fig 1b, head-to-tail coordination of ligands)

|                                   |                                                                                                                   |
|-----------------------------------|-------------------------------------------------------------------------------------------------------------------|
| CCDC number                       | 1883532                                                                                                           |
| Empirical formula                 | C <sub>58</sub> H <sub>44</sub> Ag <sub>2</sub> F <sub>6</sub> O <sub>6</sub> S <sub>6</sub>                      |
| Formula weight                    | 1359.03                                                                                                           |
| Temperature                       | 120(2) K                                                                                                          |
| Wavelength                        | 0.71073 Å                                                                                                         |
| Crystal system                    | Monoclinic                                                                                                        |
| Space group                       | P 21/c                                                                                                            |
| Unit cell dimensions              | a = 15.8914(11) Å    alpha = 90 °<br>b = 14.2792(10) Å    beta = 94.932(2) °<br>c = 26.5135(18) Å    gamma = 90 ° |
| Volume                            | 5994.1 (7) Å <sup>3</sup>                                                                                         |
| Z                                 | 4                                                                                                                 |
| Calculated density                | 1.506 Mg/m <sup>-3</sup>                                                                                          |
| Absorption coefficient            | 0.928 mm <sup>-1</sup>                                                                                            |
| F(000)                            | 2736                                                                                                              |
| Crystal size                      | 0.600 x 0.150 x 0.060 mm <sup>3</sup>                                                                             |
| Theta range for data collection   | 1.542 to 26.760 °                                                                                                 |
| Limiting indices                  | -20 ≤ h ≤ 20, -18 ≤ k ≤ 18, -33 ≤ l ≤ 33                                                                          |
| Reflections collected / unique    | 93239 / 12661 [R(int) = 0.0378]                                                                                   |
| Completeness to theta = 25.242    | 99.7 %                                                                                                            |
| Absorption correction             | Semi-empirical from equivalents                                                                                   |
| Max. and min. transmission        | 0.7454 and 0.6047                                                                                                 |
| Refinement method                 | Full-matrix least-squares on F <sup>2</sup>                                                                       |
| Data / restraints / parameters    | 12661 / 1 / 707                                                                                                   |
| Goodness-of-fit on F <sup>2</sup> | 1.040                                                                                                             |
| Final R indices [I > 2sigma(I)]   | R1 = 0.0324, wR2 = 0.0744                                                                                         |
| R indices (all data)              | R1 = 0.0380, wR2 = 0.0761                                                                                         |
| Extinction coefficient            | n/a                                                                                                               |
| Largest diff. peak and hole       | 0.721 and -0.513 e.Å <sup>-3</sup>                                                                                |

**Table S5.** Crystal data and structure refinement for silver complex **1c**

|                                   |                                                                                                                             |
|-----------------------------------|-----------------------------------------------------------------------------------------------------------------------------|
| CCDC number                       | 1883538                                                                                                                     |
| Empirical formula                 | C <sub>56</sub> H <sub>44</sub> Ag <sub>3</sub> N <sub>3</sub> O <sub>9</sub> S <sub>4</sub>                                |
| Formula weight                    | 1354.79                                                                                                                     |
| Temperature                       | 150(2) K                                                                                                                    |
| Wavelength                        | 0.71073 Å                                                                                                                   |
| Crystal system                    | Triclinic                                                                                                                   |
| Space group                       | P -1                                                                                                                        |
| Unit cell dimensions              | a = 12.755(3) Å    alpha = 111.882(5) °<br>b = 13.140(3) Å    beta = 102.770(4) °<br>c = 16.721(4) Å    gamma = 92.073(5) ° |
| Volume                            | 2514.4 (9) Å <sup>3</sup>                                                                                                   |
| Z                                 | 2                                                                                                                           |
| Calculated density                | 1.789 Mg/m <sup>-3</sup>                                                                                                    |
| Absorption coefficient            | 1.386 mm <sup>-1</sup>                                                                                                      |
| F(000)                            | 1356                                                                                                                        |
| Crystal size                      | 0.140 x 0.030 x 0.030 mm <sup>3</sup>                                                                                       |
| Theta range for data collection   | 3.103 to 26.372 °                                                                                                           |
| Limiting indices                  | -15 ≤ h ≤ 15, -16 ≤ k ≤ 16, -20 ≤ l ≤ 20                                                                                    |
| Reflections collected / unique    | 78956 / 10193 [R(int) = 0.0603]                                                                                             |
| Completeness to theta = 25.242    | 99.2 %                                                                                                                      |
| Absorption correction             | Semi-empirical from equivalents                                                                                             |
| Max. and min. transmission        | 0.7454 and 0.6977                                                                                                           |
| Refinement method                 | Full-matrix least-squares on F <sup>2</sup>                                                                                 |
| Data / restraints / parameters    | 10193 / 0 / 680                                                                                                             |
| Goodness-of-fit on F <sup>2</sup> | 1.023                                                                                                                       |
| Final R indices [I > 2sigma(I)]   | R1 = 0.0319, wR2 = 0.0661                                                                                                   |
| R indices (all data)              | R1 = 0.0494, wR2 = 0.0724                                                                                                   |
| Extinction coefficient            | n/a                                                                                                                         |
| Largest diff. peak and hole       | 0.971 and -0.739 e.Å <sup>-3</sup>                                                                                          |

**Table S6.** Crystal data and structure refinement for silver complex **1d**

|                                   |                                                                                                                             |
|-----------------------------------|-----------------------------------------------------------------------------------------------------------------------------|
| CCDC number                       | 1883536                                                                                                                     |
| Empirical formula                 | C <sub>67</sub> H <sub>54</sub> Ag <sub>2</sub> Cl <sub>2</sub> F <sub>6</sub> O <sub>6</sub> P <sub>2</sub> S <sub>4</sub> |
| Formula weight                    | 1545.92                                                                                                                     |
| Temperature                       | 150(2) K                                                                                                                    |
| Wavelength                        | 0.71073 Å                                                                                                                   |
| Crystal system                    | Orthorhombic                                                                                                                |
| Space group                       | P n a 21                                                                                                                    |
| Unit cell dimensions              | a = 26.230(2) Å    alpha = 90 °<br>b = 9.4521(8) Å    beta = 90 °<br>c = 25.912(2) Å    gamma = 90 °                        |
| Volume                            | 6424.2 (9) Å <sup>3</sup>                                                                                                   |
| Z                                 | 4                                                                                                                           |
| Calculated density                | 1.598 Mg/m <sup>-3</sup>                                                                                                    |
| Absorption coefficient            | 0.942 mm <sup>-1</sup>                                                                                                      |
| F(000)                            | 3120                                                                                                                        |
| Crystal size                      | 0.150 x 0.040 x 0.020 mm <sup>3</sup>                                                                                       |
| Theta range for data collection   | 1.553 to 26.374 °                                                                                                           |
| Limiting indices                  | -30 ≤ h ≤ 32, -11 ≤ k ≤ 11, -32 ≤ l ≤ 26                                                                                    |
| Reflections collected / unique    | 44069 / 11444 [R(int) = 0.0520]                                                                                             |
| Completeness to theta = 25.242    | 99.8 %                                                                                                                      |
| Absorption correction             | Semi-empirical from equivalents                                                                                             |
| Max. and min. transmission        | 0.7454 and 0.6655                                                                                                           |
| Refinement method                 | Full-matrix least-squares on F <sup>2</sup>                                                                                 |
| Data / restraints / parameters    | 11444 / 1 / 805                                                                                                             |
| Goodness-of-fit on F <sup>2</sup> | 1.021                                                                                                                       |
| Final R indices [I > 2sigma(I)]   | R1 = 0.0309, wR2 = 0.0547                                                                                                   |
| R indices (all data)              | R1 = 0.0404, wR2 = 0.0578                                                                                                   |
| Extinction coefficient            | n/a                                                                                                                         |
| Largest diff. peak and hole       | 0.353 and -0.346 e.Å <sup>-3</sup>                                                                                          |

## Photophysical properties of ligand **1** and silver(I) complexes **1a–d**

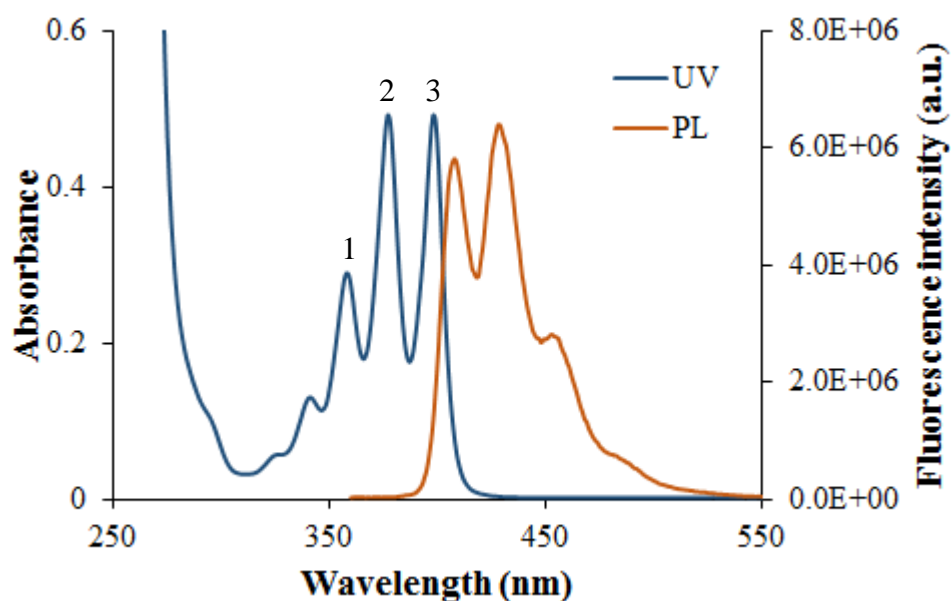

**Figure S4.** Absorption (blue) and fluorescence emission (red,  $\lambda_{\text{excitation}} = 345 \text{ nm}$ ) spectra of ligand **1** (30  $\mu\text{M}$ ,  $\text{CH}_2\text{Cl}_2$ ). Selected maxima of absorption: 0.29 (358 nm); 0.49 (377 nm); 0.49 (398 nm).

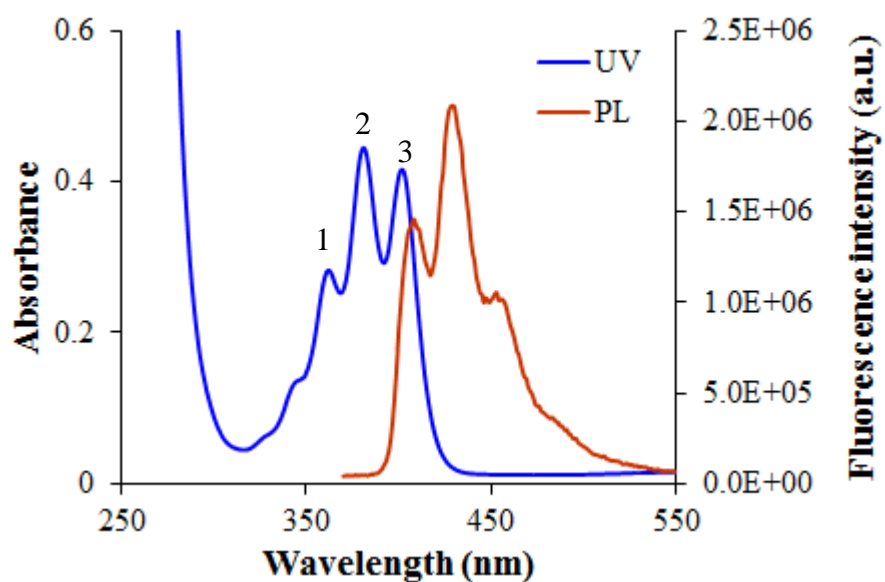

**Figure S5.** Absorption (blue) and fluorescence emission (red,  $\lambda_{\text{excitation}} = 345 \text{ nm}$ ) spectra of complex **1a** (20  $\mu\text{M}$ ,  $\text{CH}_2\text{Cl}_2$ ). Selected peaks of absorption: 0.28 (362 nm); 0.44 (381 nm); 0.41 (402 nm).



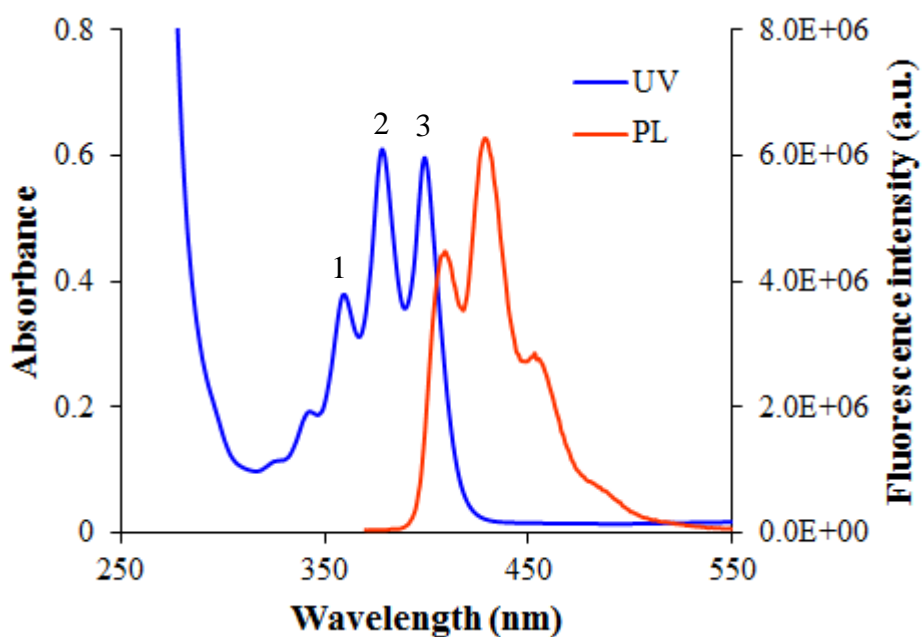

**Figure S6.** Absorption (blue) and fluorescence emission (red,  $\lambda_{\text{excitation}} = 345$  nm) spectra of complex **1b** (20  $\mu\text{M}$ ,  $\text{CH}_2\text{Cl}_2$ ). Selected maxima of absorption: 0.38 (359 nm); 0.61 (378 nm); 0.60 (399 nm).

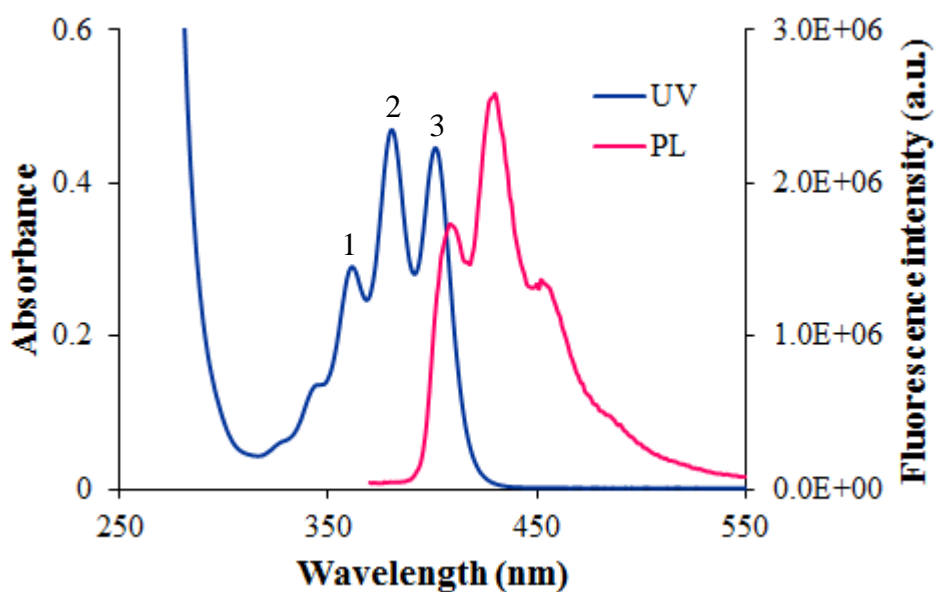

**Figure S7.** Absorption (blue) and fluorescence emission (pink,  $\lambda_{\text{excitation}} = 345$  nm) spectra of complex **1c** (20  $\mu\text{M}$ ,  $\text{CH}_2\text{Cl}_2$ ). Selected maxima of absorption: 0.29 (361 nm); 0.47 (380 nm); 0.44 (401 nm).

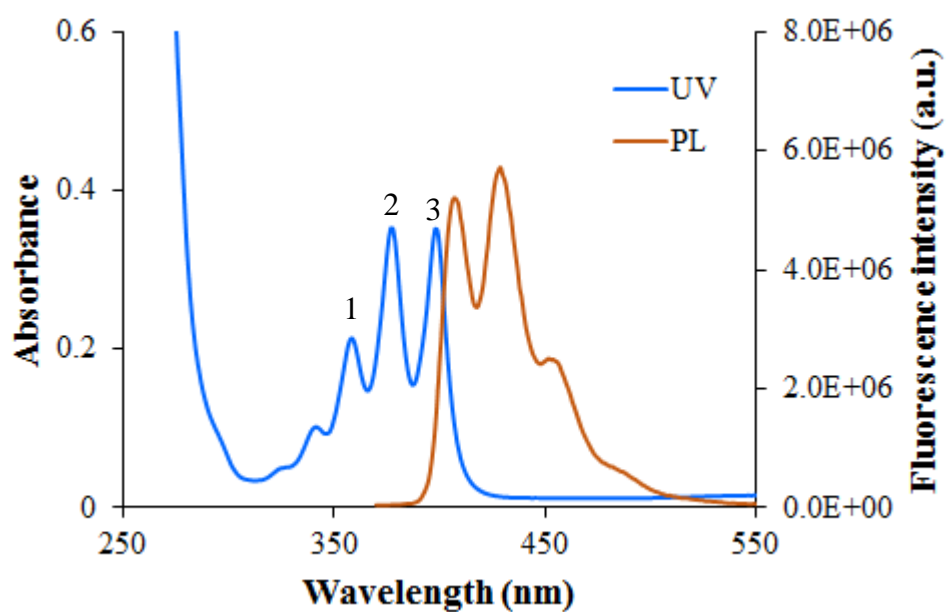

**Figure S8.** Absorption (blue) and fluorescence emission (red,  $\lambda_{\text{excitation}} = 345$  nm) spectra of complex **1d** (20  $\mu$ M,  $\text{CH}_2\text{Cl}_2$ ). Selected maxima of absorption: 0.21 (358 nm); 0.35 (377 nm); 0.35 (398 nm).

## $^1\text{H}$ NMR Study

### $^1\text{H}$ NMR of three batches of complex **1a**

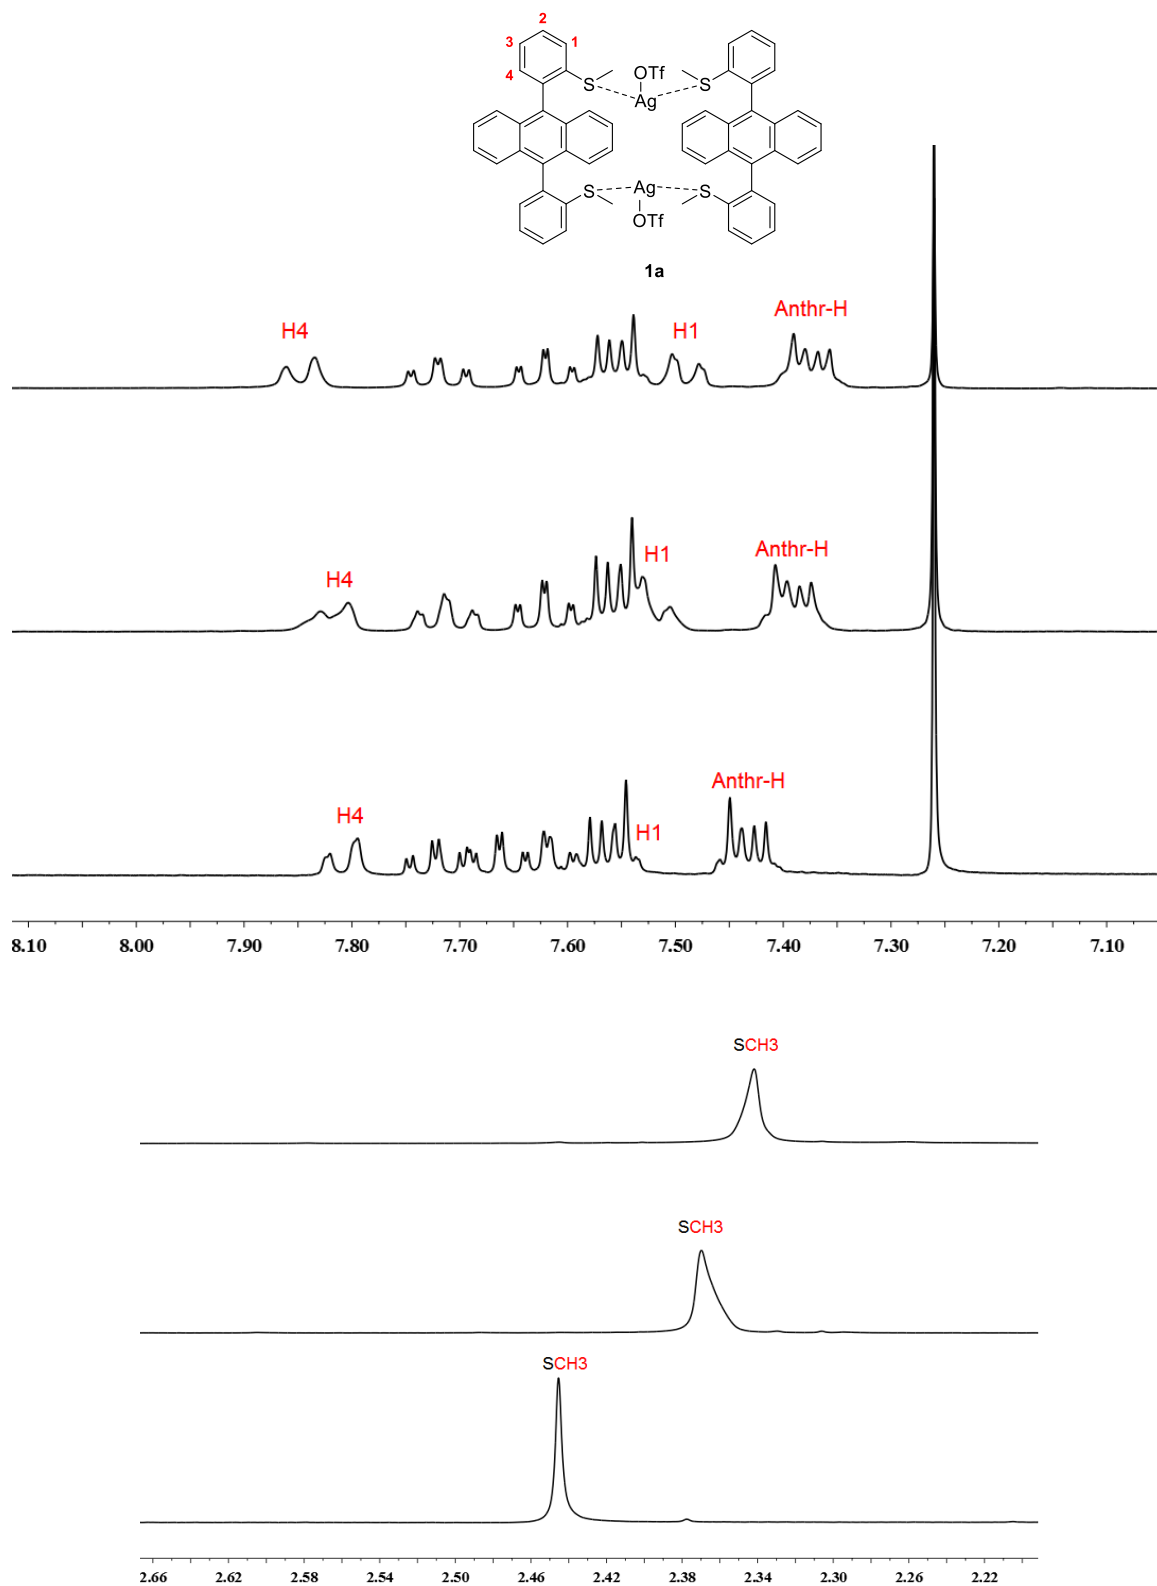

**Figure S9.**  $^1\text{H}$  NMR of three batches of complex **1a** (2 mM,  $\text{CDCl}_3$ , 298 K) obtained by the same procedure.

## Variable temperature NMR

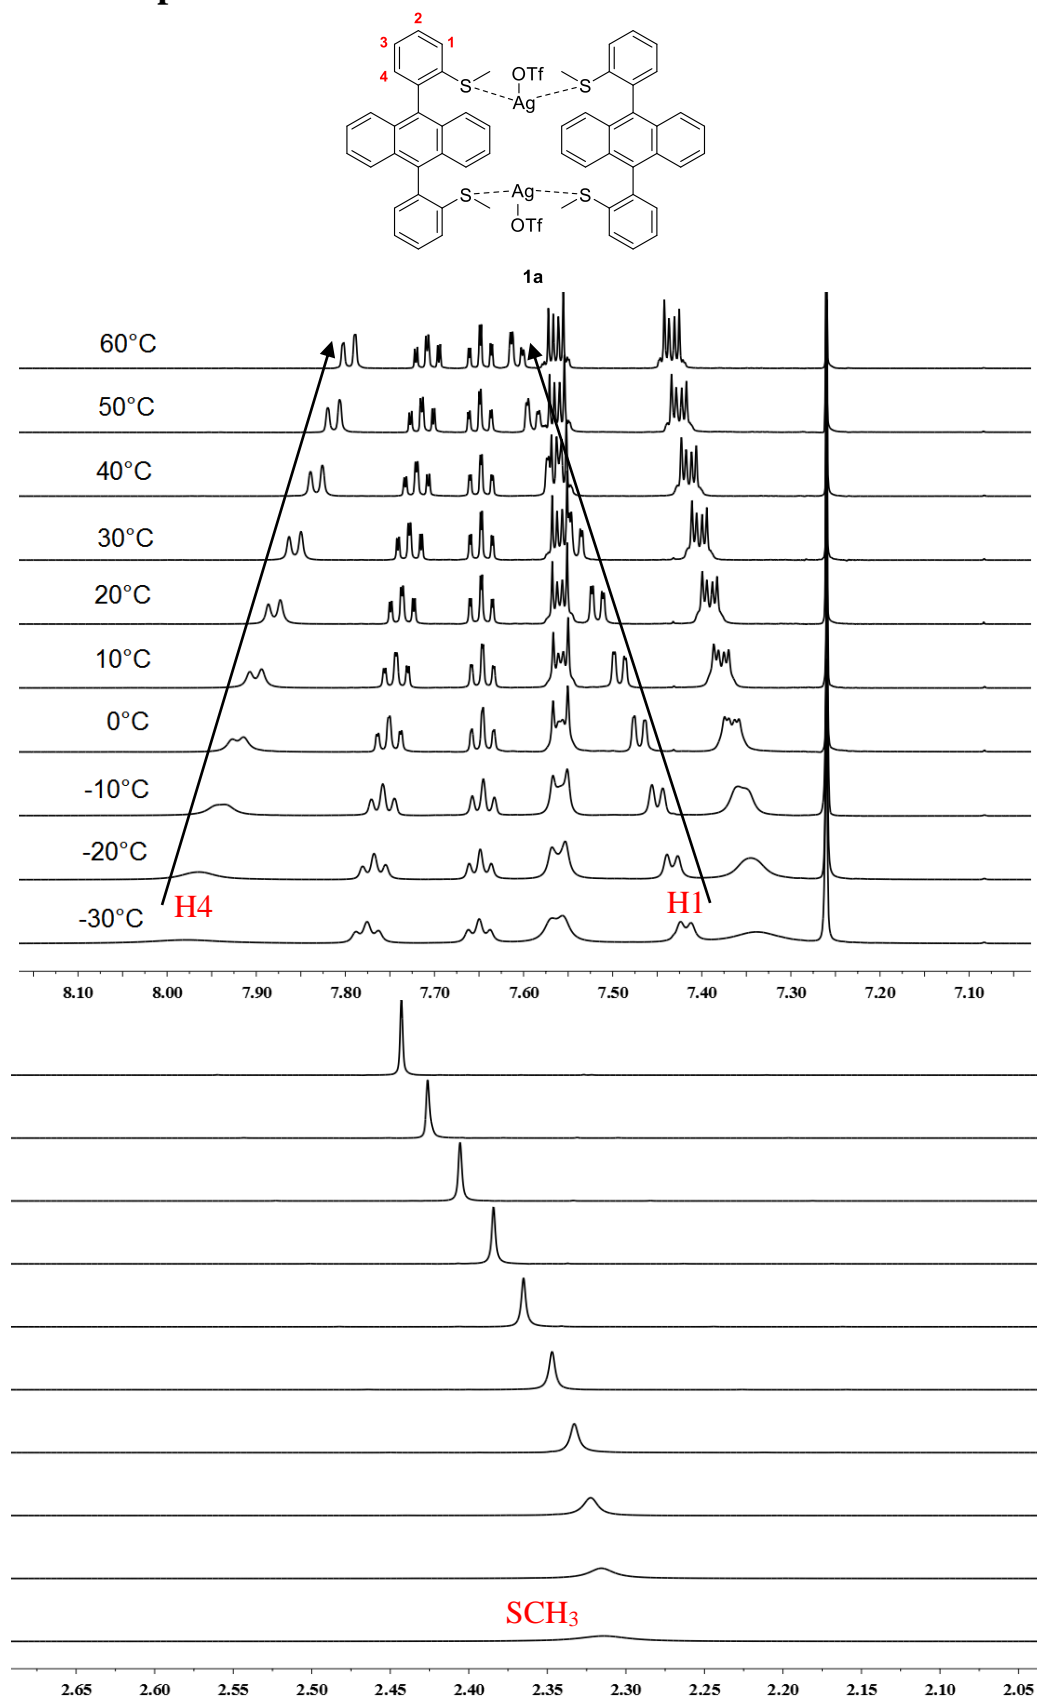

**Figure S10.** Proton VT-NMR of complex **1a** (7 mM, CDCl<sub>3</sub>) from -30 °C to 60 °C.

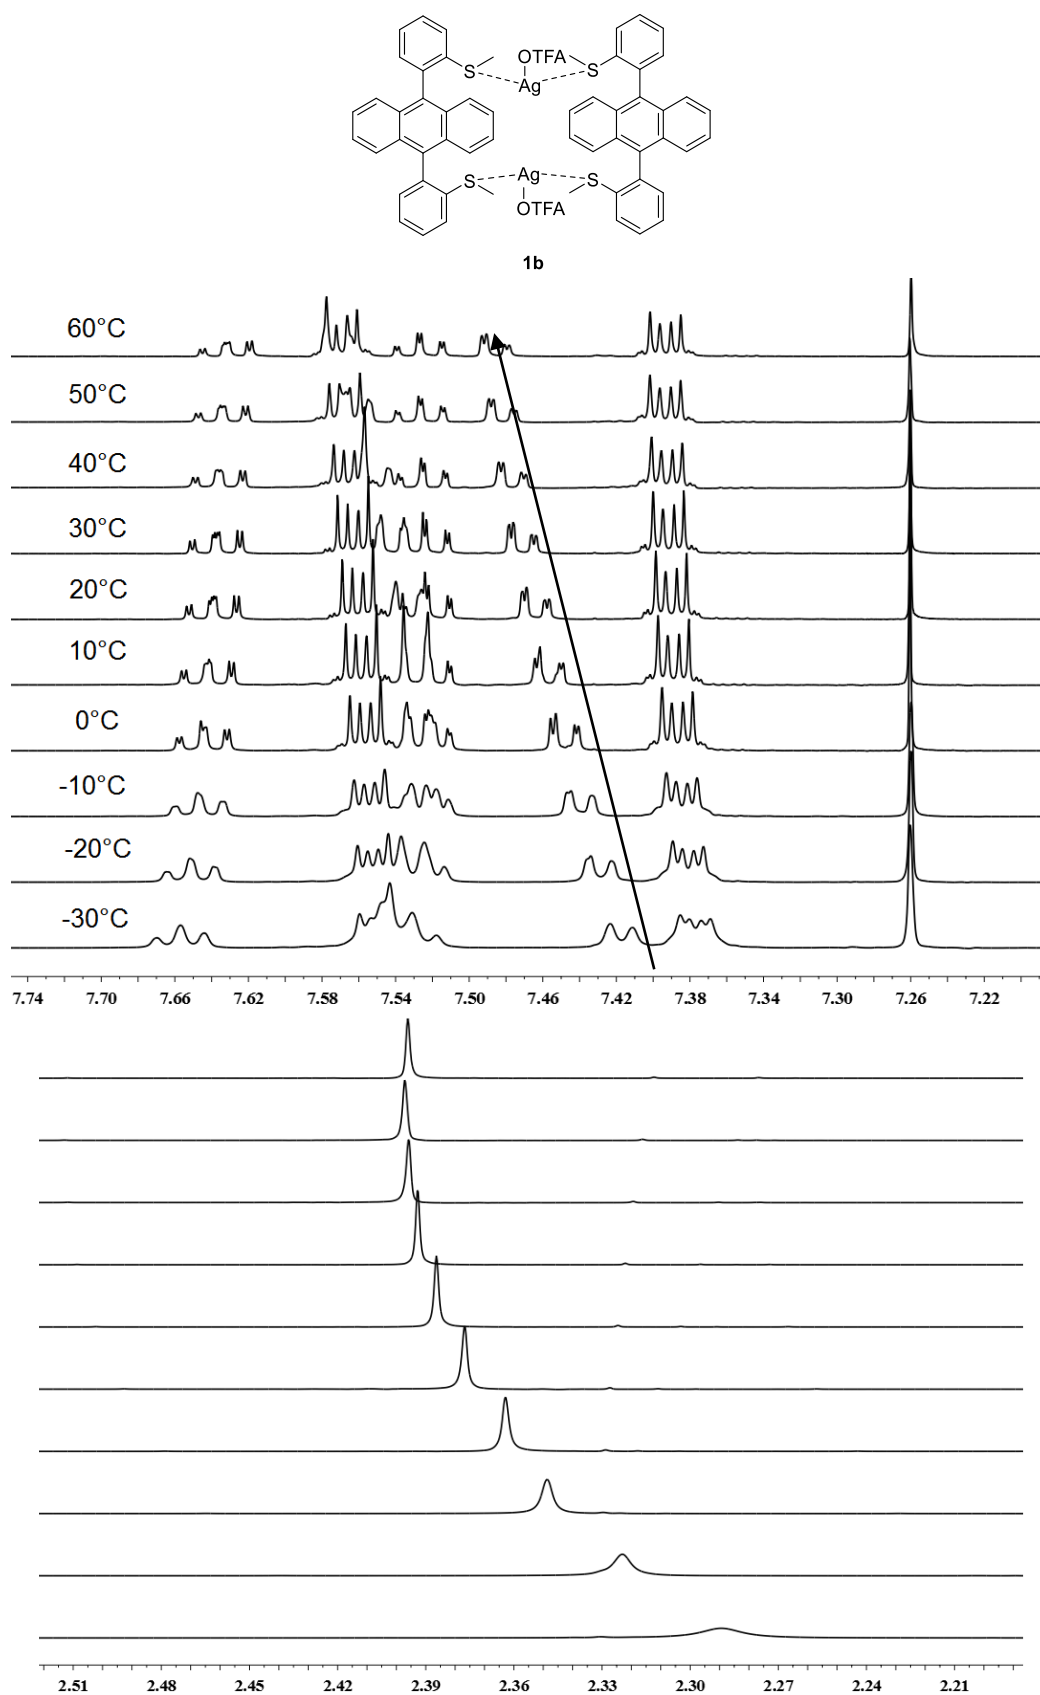

**Figure S11.** Variable temperature  $^1\text{H}$  NMR of complex **1b** (7 mM,  $\text{CDCl}_3$ ) from  $-30^\circ\text{C}$  to  $60^\circ\text{C}$ .

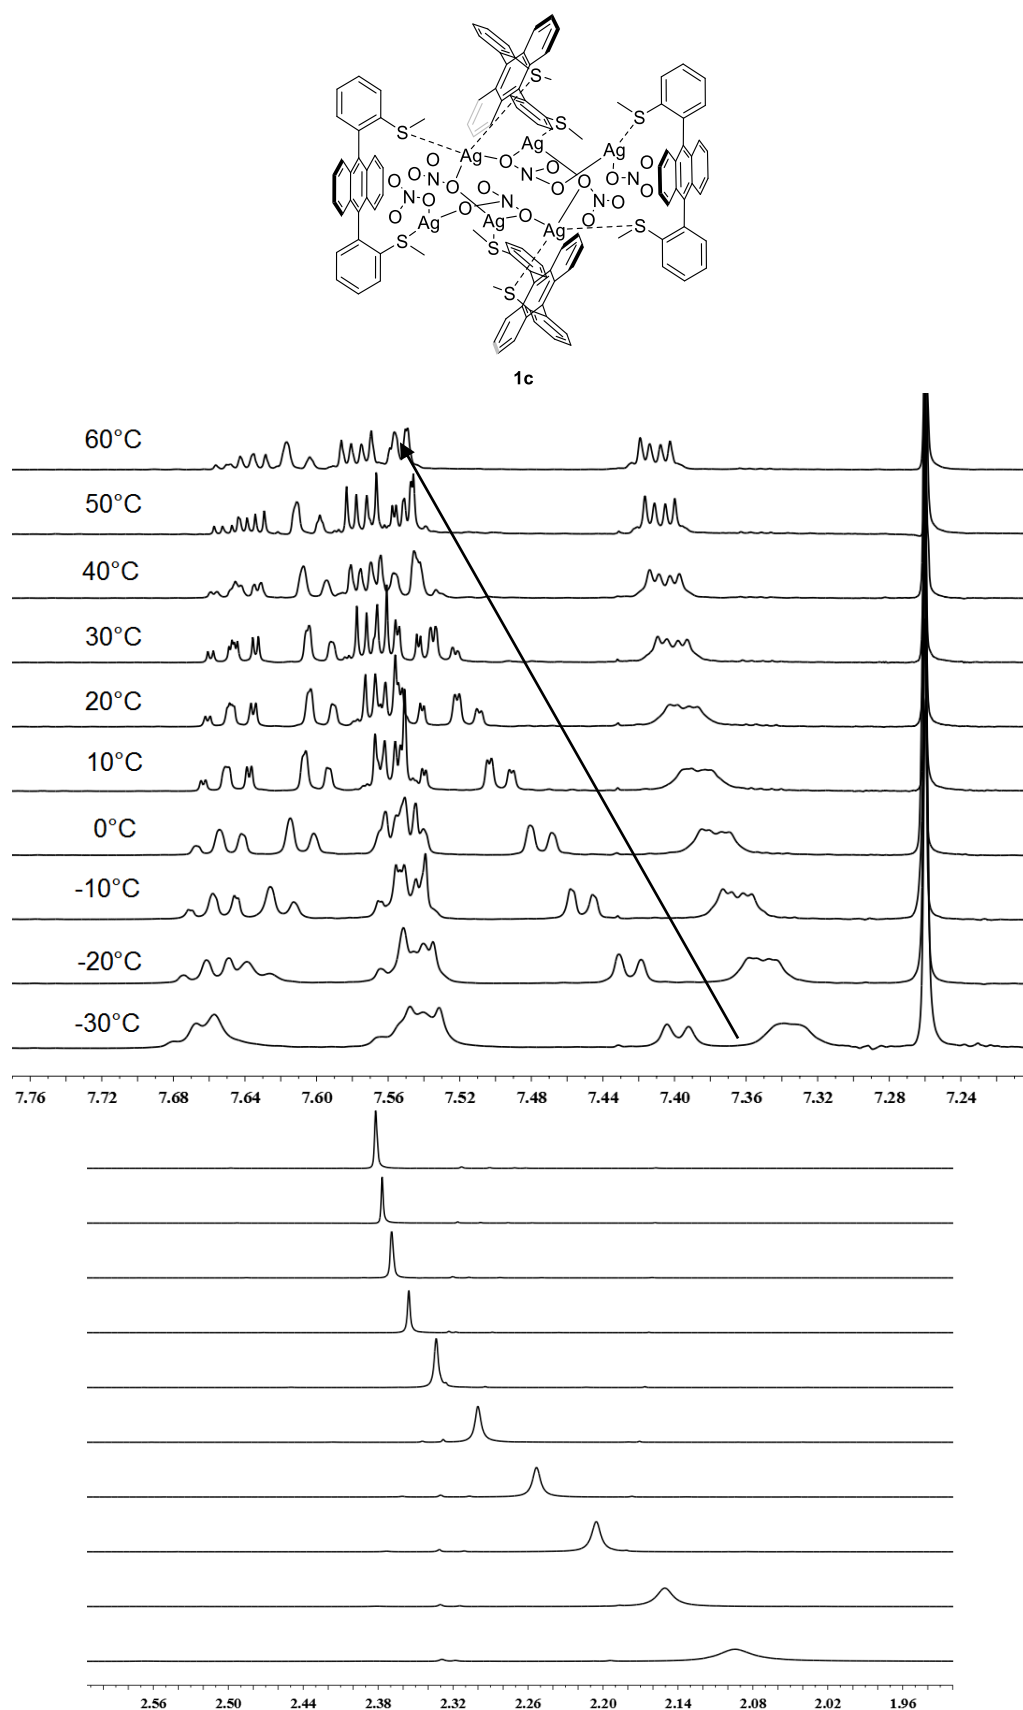

**Figure S12.** Variable temperature  $^1\text{H}$  NMR of complex **1c** (7 mM,  $\text{CDCl}_3$ ) from  $-30^\circ\text{C}$  to  $60^\circ\text{C}$ .

## Diffusion-Ordered Spectroscopy $^1\text{H}$ NMR (DOSY)

### General Information:

NMR experiments were performed at 298 K using a Bruker Avance III 600 ( $^1\text{H}$ : 600.16 MHz,  $^{13}\text{C}$ : 150.93 MHz) instrument equipped with a 5 mm gradient inverse broadband probe.

DOSY NMR spectroscopy: “Two-dimensional” version of the pulsed field gradient spin-echo experiment for measuring translational diffusion constants using the following parameters: spectral width, 10 ppm; number of scans 8; recycling delay 1 s, intergradient delay  $\Delta$  150 ms, gradient pulse duration  $\delta$  1 ms. The pulse gradients ( $G$ ) were incremented from 2 to 95% of the maximum gradient strength in a linear ramp in 16 steps. The diffusion coefficient  $D$  can be obtained by fitting a specific resonance area,  $I$ , obtained at different gradient powers ( $G$ ) using the following equation:  $I/I_0 = \exp[-\gamma G D \delta (\Delta - \delta/3)]$

**Table S7.** Diffusion coefficients ( $D$ ,  $\times 10^{-9} \text{ m}^2/\text{s}$ ) of silver complexes **1a–d** (600 MHz,  $\text{CDCl}_3$ , 5–7 mM, 298 K)

| $D^a$     | First series<br>Batch 1<br>(conc.) | Second series<br>Batch 2 (conc.)                    | Third series<br>Batch 3 (conc.)                     |
|-----------|------------------------------------|-----------------------------------------------------|-----------------------------------------------------|
| <b>1a</b> | 1.85 (6.1 mM)                      | 0.73 (5 mM) <sup>b</sup> ; 0.58 (5 mM) <sup>b</sup> | 1.69 (5 mM) <sup>c</sup> ; 2.00 (5 mM) <sup>c</sup> |
| <b>1b</b> | 1.76 (6.5 mM)                      | 0.80 (5 mM) <sup>b</sup> ; 0.89 (5 mM) <sup>b</sup> | 1.69 (5 mM) <sup>c</sup> ; 1.35 (5 mM) <sup>c</sup> |
| <b>1c</b> | 0.93 (7 mM)                        | 0.76 (5 mM) <sup>b</sup> ; 0.81 (5 mM) <sup>b</sup> | -                                                   |
| <b>1d</b> | 0.91 (5.7 mM)                      | 0.85 (5 mM) <sup>b</sup> ; 0.80 (5 mM) <sup>b</sup> | -                                                   |

<sup>a</sup>Average  $D$  values calculated for aromatic and aliphatic protons, with estimated errors of  $\pm 15$ –20%. <sup>b</sup>Measurements were done twice on the same NMR tube. <sup>c</sup>Measurements were run on the same batch of complex but done in different NMR tube.

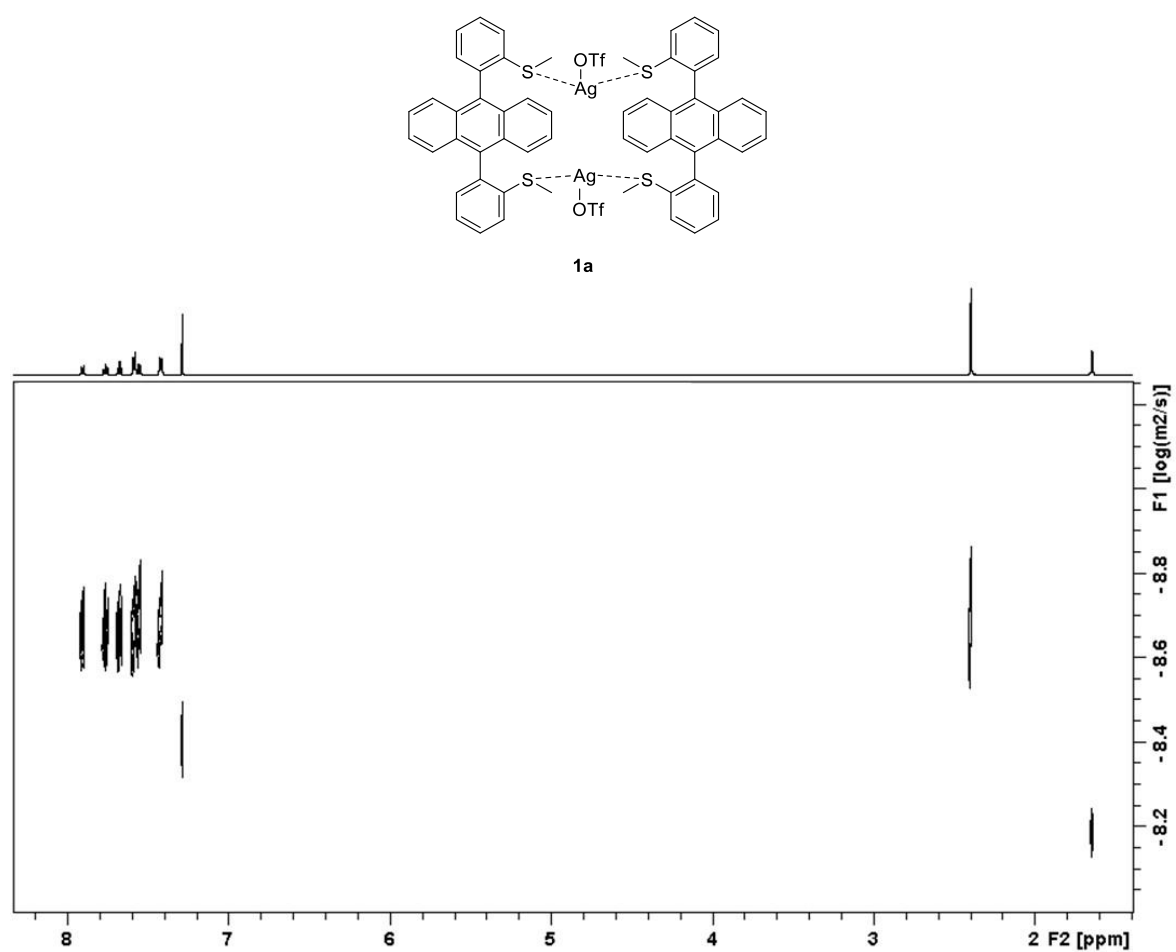

**Figure S13.** DOSY spectrum of complex **1a** (5 mM) in CDCl<sub>3</sub>.



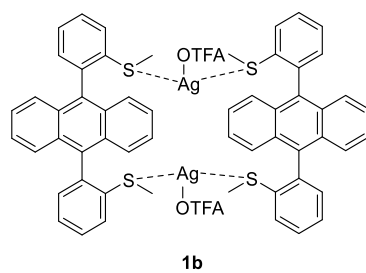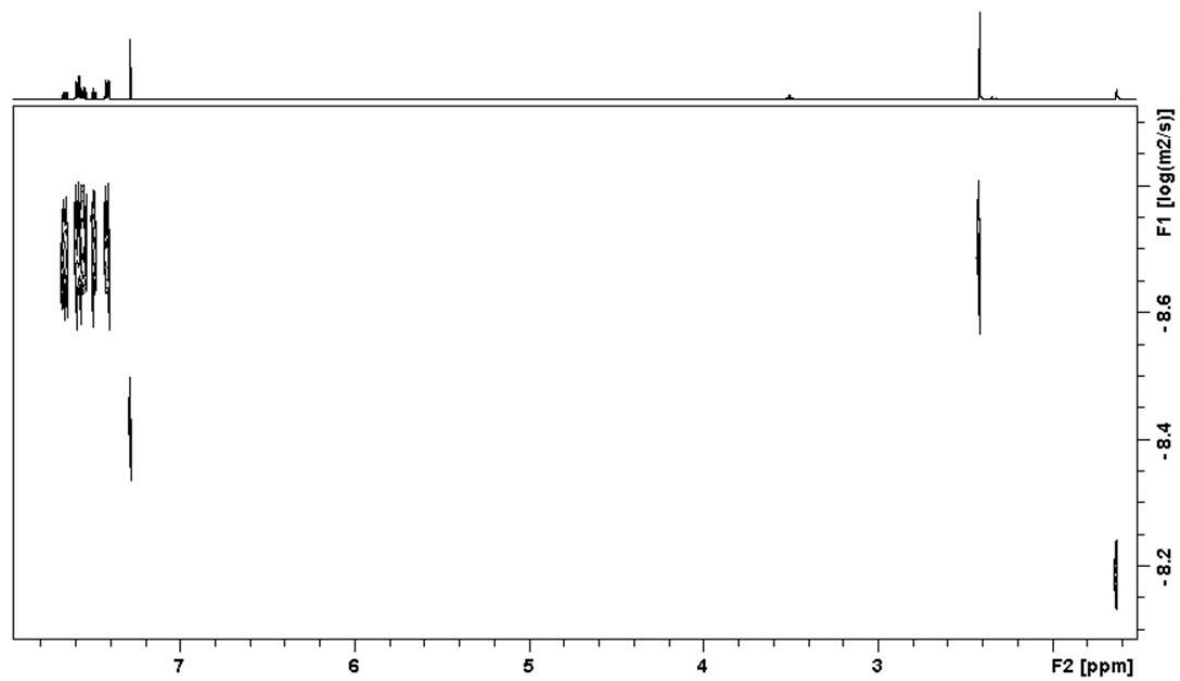

**Figure S14.** DOSY spectrum of complex **1b** (5 mM) in  $\text{CDCl}_3$ .

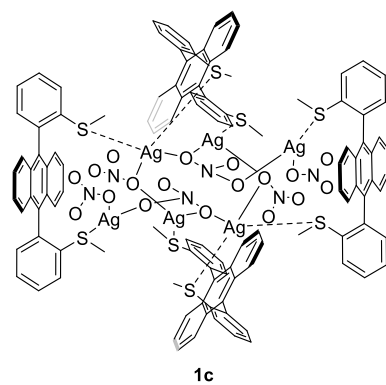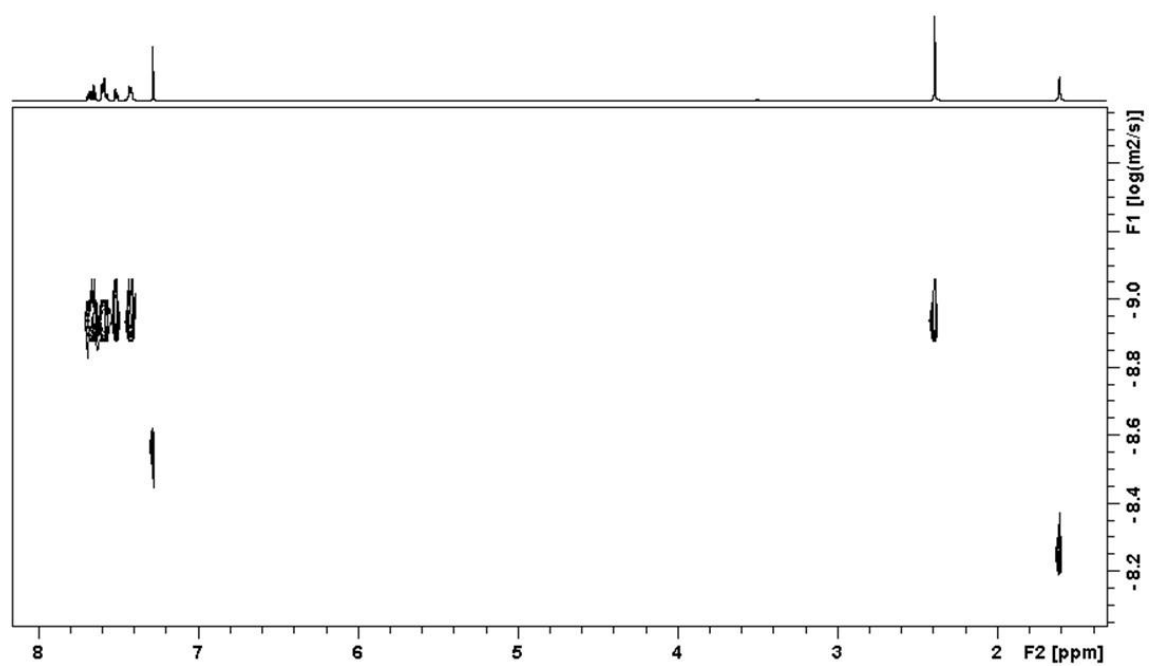

**Figure S15.** DOSY spectrum of complex **1c** (5 mM) in  $\text{CDCl}_3$

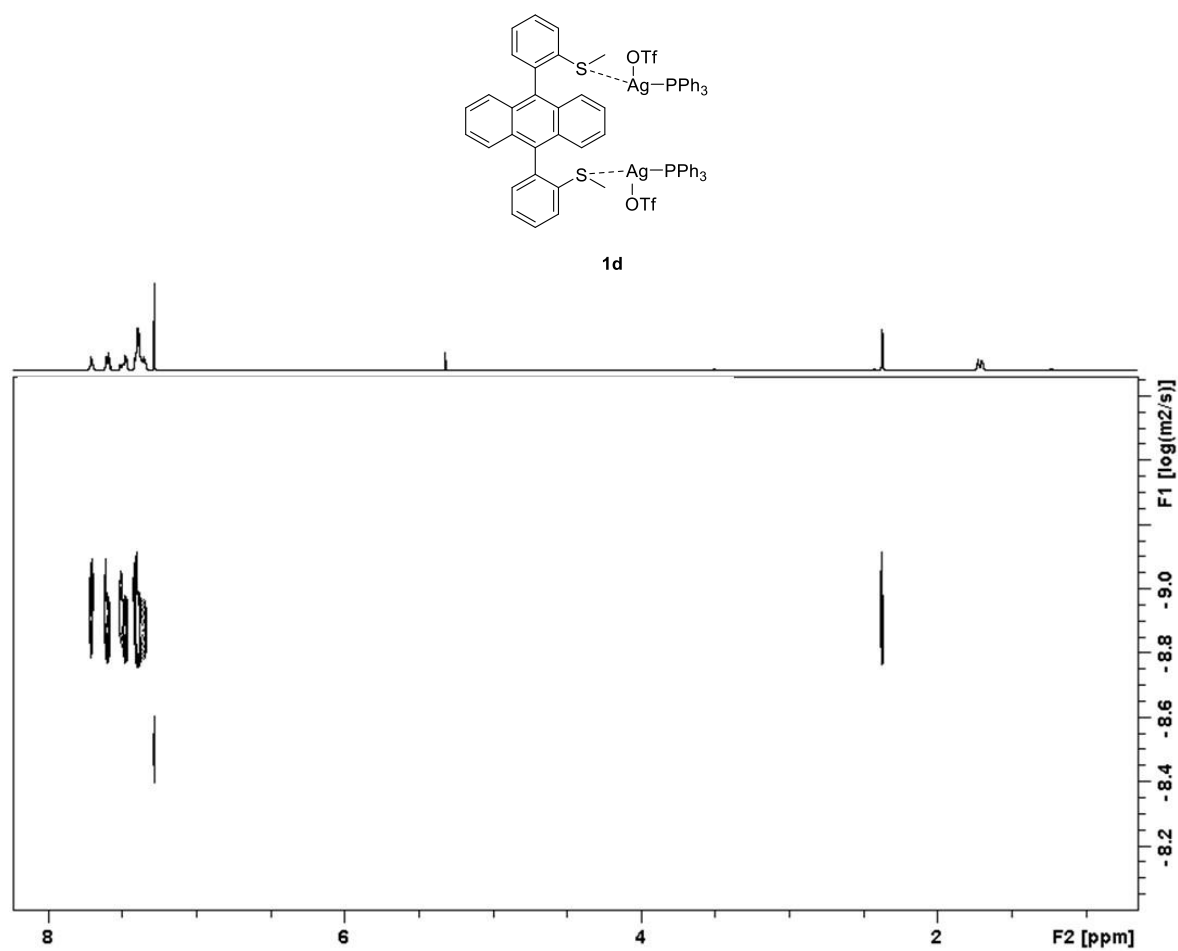

**Figure S16.** DOSY spectrum of complex **1d** (5 mM) in CDCl<sub>3</sub>

## Silver catalysis

### Synthesis of alkynes for silver catalysed cyclization

#### Synthesis of alkyne **2**<sup>[5]</sup>

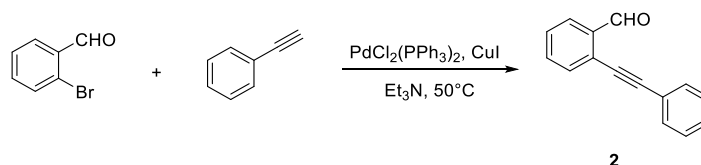

Compound **2**: An oven-dried Schlenk tube was charged with 2-bromobenzaldehyde (0.31 mL, 2.7 mmol), phenylacetylene (0.31 mL, 2.8 mmol), copper iodide (10.5 mg, 0.054 mmol), and bis(triphenylphosphine)palladium chloride (38 mg, 0.054 mmol). The mixture was degassed and flushed with argon for three times, then triethylamine (5 mL) was added and the resulting mixture was stirred at  $50^\circ\text{C}$  for 24 h. After cooling to room temperature, the slurry was taken up in dichloromethane (50 mL) and water (20 mL). The aqueous layer was extracted with  $\text{CH}_2\text{Cl}_2$  ( $2 \times 20$  mL). The combined organic layers were dried over magnesium sulfate, then concentrated and purified by column chromatography on silica gel (eluent: petrol ether/ethyl acetate = 75:1) to afford product **2** (438 mg, 79% yield) as reddish oil.

$^1\text{H}$  NMR (300 MHz,  $\text{CDCl}_3$ )  $\delta$  10.65 (s, 1H), 7.95 (dd,  $J = 7.59, 1.02$  Hz, 1H), 7.54-7.66 (m, 4H), 7.36-7.48 (m, 4H);  $^{13}\text{C}$  NMR (75 MHz,  $\text{CDCl}_3$ )  $\delta$  191.7, 135.9, 133.8, 133.3, 131.7, 129.1, 128.7, 128.6, 127.3, 126.9, 122.4, 96.4, 85.0. The data are identical to literature.<sup>[5]</sup>

#### Synthesis of alkyne **3**<sup>[6]</sup>

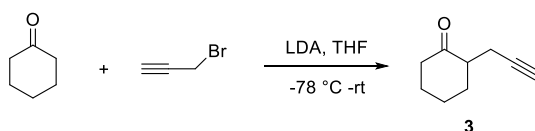

Compound **3**: To a solution of LDA (6.2 mL, 14.4 mmol, 2 M) in anhydrous THF (3 mL) was added dropwise cyclohexanone (1.0 mL, 9.6 mmol) at  $-78^\circ\text{C}$  under argon atmosphere. The mixture was stirred at  $-78^\circ\text{C}$  for 30 min then propargyl bromide (1.0 mL, 11.5 mmol) was added. The resulting mixture was stirred at  $-78^\circ\text{C}$  for further 1 h and then allowed to warm up to room temperature and stirred overnight. Saturated ammonium chloride (5 mL) was added and the mixture was extracted with dichloromethane ( $3 \times 15$  mL). The combined organic layers were dried over magnesium sulfate, then concentrated and purified by column chromatography on silica gel (eluent: petrol ether/ethyl acetate = 75:1) to afford product **3** (827 mg, 63% yield, estimated purity *ca.* >90%) as a light yellow oil.

$^1\text{H}$  NMR (300 MHz,  $\text{CDCl}_3$ )  $\delta$  2.00-2.64 (m, 8H), 1.95 (t,  $J = 2.7$  Hz, 1H), 1.81-1.93 (m, 1H), 1.55-1.79 (m, 2H), 1.33-1.47 (m, 1H);  $^{13}\text{C}$  NMR (75 MHz,  $\text{CDCl}_3$ )  $\delta$  210.9, 82.6, 69.5, 49.6, 42.0, 33.3, 27.9, 25.2, 18.9.

The data are identical to the literature.<sup>[6]</sup>

### General procedure for intramolecular cyclization of alkyne **2** to compound **4**

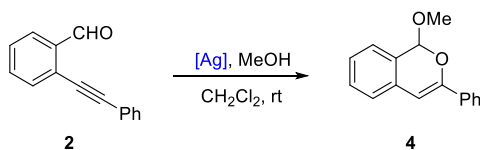

A dried Schlenk tube was charged with the silver salt (0.5 mmol%-5 mol %), then degassed and backfilled with argon for three times. A solution of alkyne **2** (30 mg, 0.15 mmol) in anhydrous CH<sub>2</sub>Cl<sub>2</sub> (1 mL) and MeOH (18  $\mu$ L, 0.45 mmol) was added and the mixture was stirred at room temperature for 12 h. The crude solution was concentrated under reduced pressure and purified by column chromatography on silica gel (eluent: petrol ether/ ethyl acetate = 50:1) to obtain product **4**.

<sup>1</sup>H NMR (300 MHz, CDCl<sub>3</sub>)  $\delta$  7.81-7.85 (m, 2H), 7.33-7.45 (m, 4H), 7.26-7.31 (m, 2H), 7.23 (d,  $J$  = 7.44 Hz, 1H), 6.62 (s, 1H), 6.16 (s, 1H), 3.62 (s, 3H); <sup>13</sup>C NMR (75 MHz, CDCl<sub>3</sub>)  $\delta$  149.5, 134.5, 130.0, 129.6, 128.8, 128.5, 127.1, 126.8, 125.9, 124.9, 124.6, 100.5, 99.9, 55.3. The data are identical to the literature.<sup>[7]</sup>

### General procedure for intermolecular cyclization of alkyne **3** to compound **5**

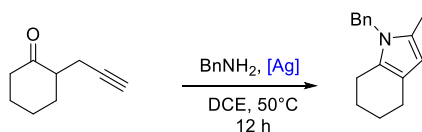

A dried Schlenk tube was charged with silver catalysis (0.5 mmol %-2.5 mol %), then degassed and backfilled with argon for three times. A solution of alkyne **3** (27 mg, 0.2 mmol) in anhydrous 1,2-dichloroethane (1 mL) and benzylamine (33  $\mu$ L, 0.3 mmol) was added. The mixture was stirred at 50 °C for 12 h. The crude solution was concentrated under reduced pressure and purified by column chromatography on silica gel (eluent: petrol ether/ ethyl acetate = 70:1) to obtain product **5**.

<sup>1</sup>H NMR (300 MHz, CDCl<sub>3</sub>)  $\delta$  7.21-7.34 (m, 3H), 6.94 (d,  $J$  = 7.14 Hz, 2H), 5.76 (s, 1H), 4.96 (s, 2H), 2.52 (t,  $J$  = 5.94 Hz, 2H), 2.43 (t,  $J$  = 5.43 Hz, 2H), 2.15 (s, 3H), 1.70-1.84 (m, 4H); <sup>13</sup>C NMR (75 MHz, CDCl<sub>3</sub>)  $\delta$  138.9, 128.7, 127.2, 127.1, 127.0, 125.9, 116.4, 105.2, 46.2, 23.9, 23.6, 23.2, 22.2, 12.1. The data are identical to the literature.<sup>[6]</sup>

## Infrared spectroscopy

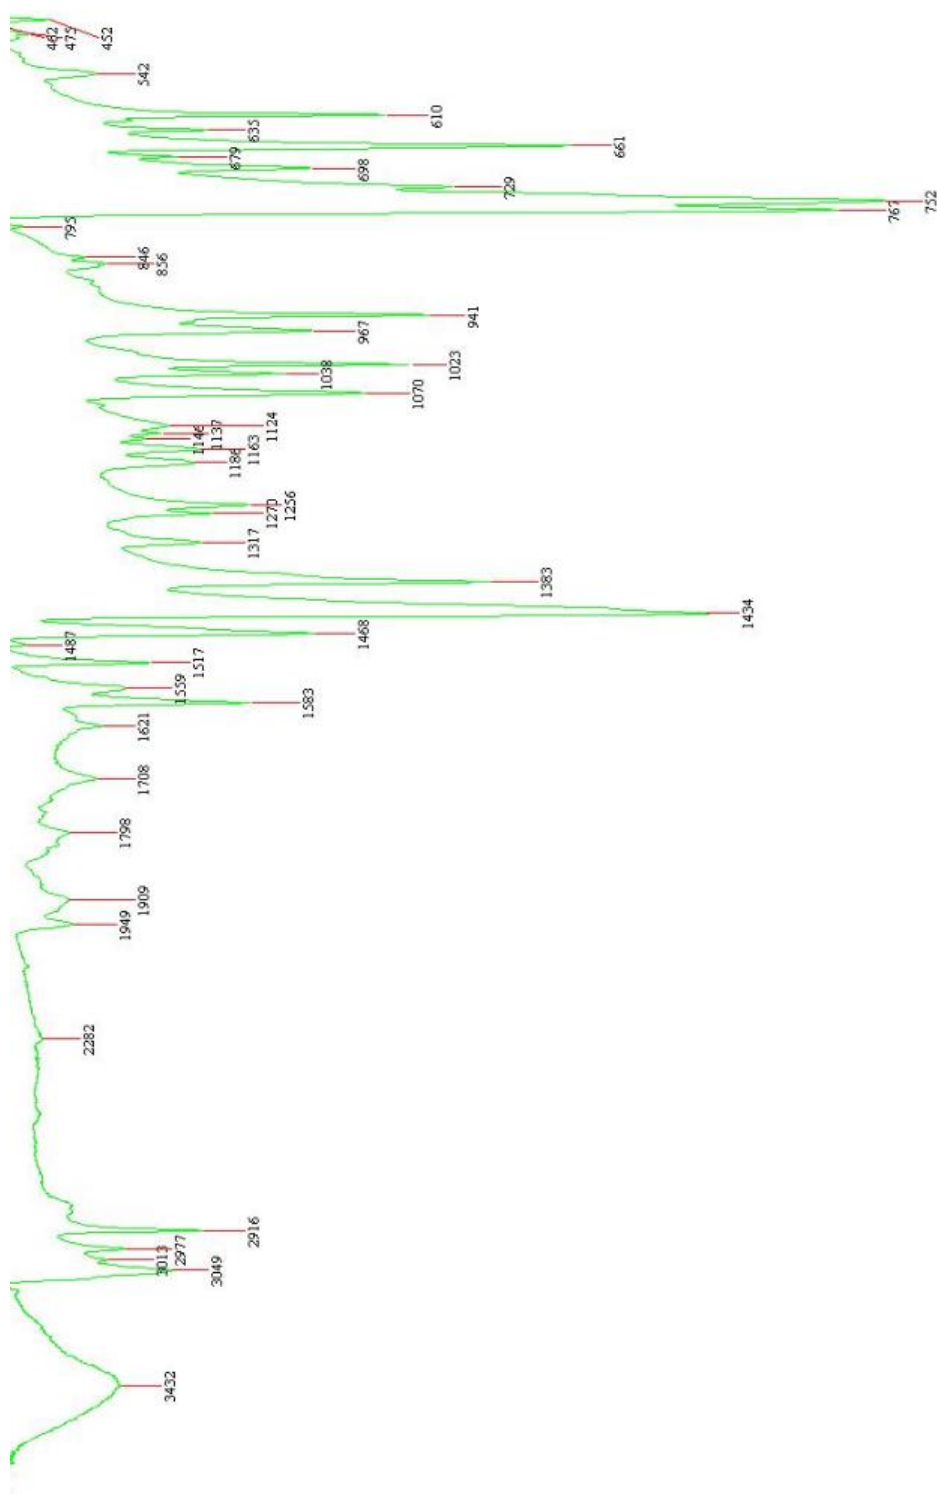

**Figure 17.** Infrared spectroscopy of ligand 1.

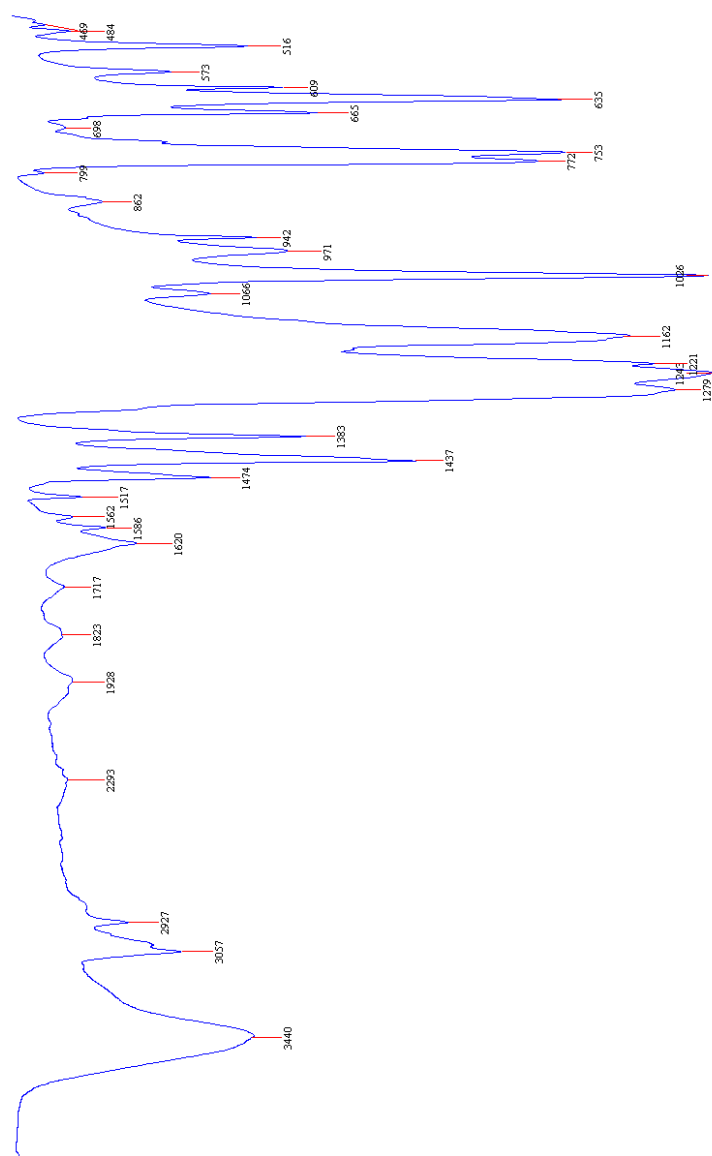

**Figure 18.** Infrared spectroscopy of complex **1a**.

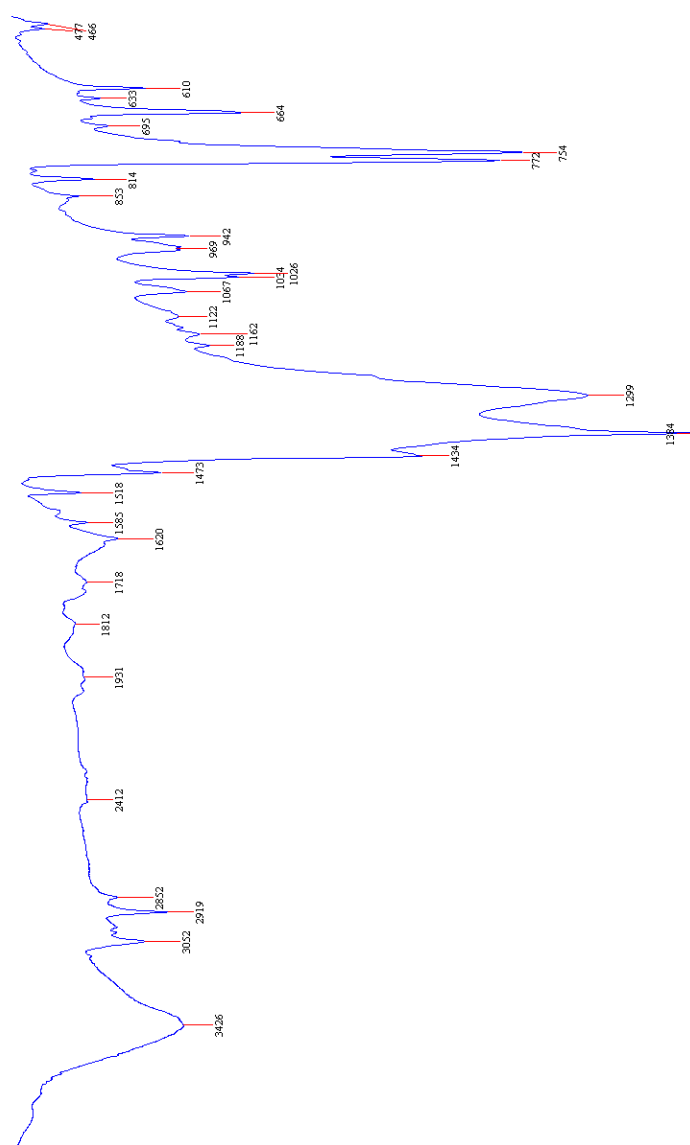

**Figure 19.** Infrared spectroscopy of complex **1b**.



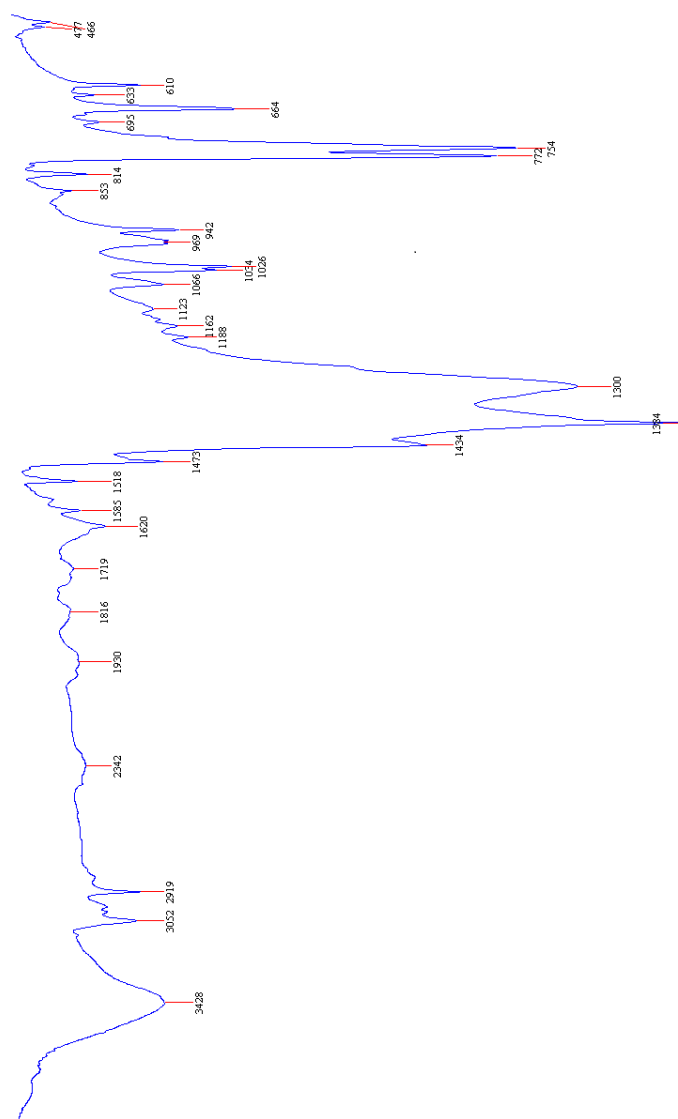

**Figure 20.** Infrared spectroscopy of complex **1c**.

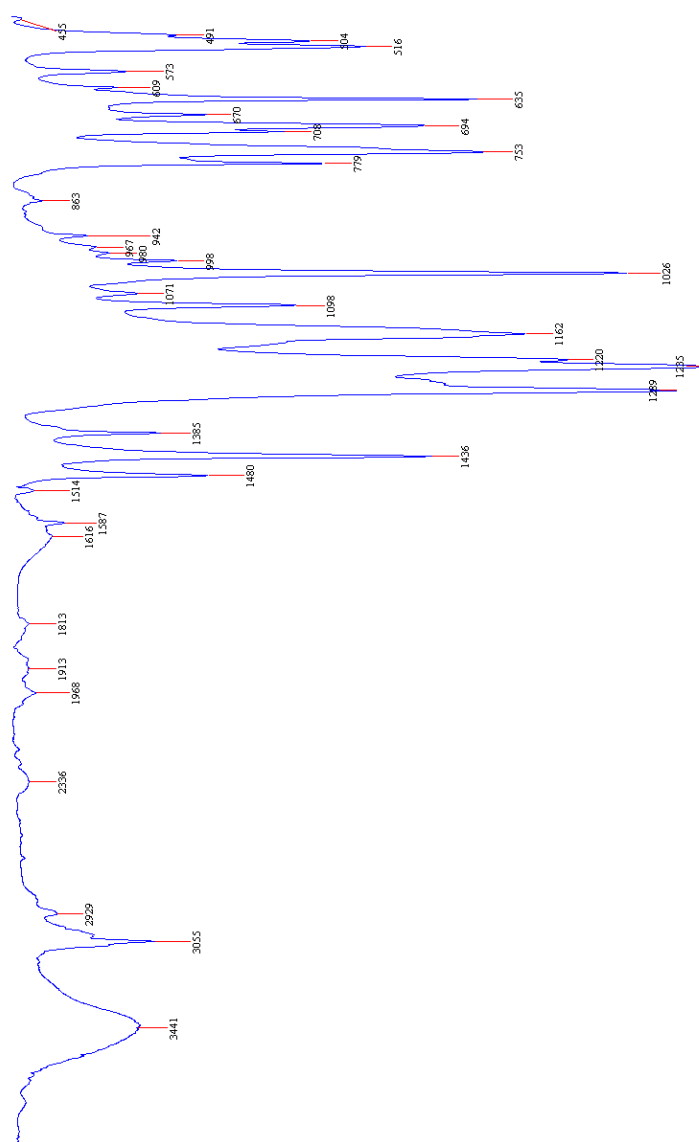

**Figure 21.** Infrared spectroscopy of complex **1d**.

# NMR spectra

## Ligand 1

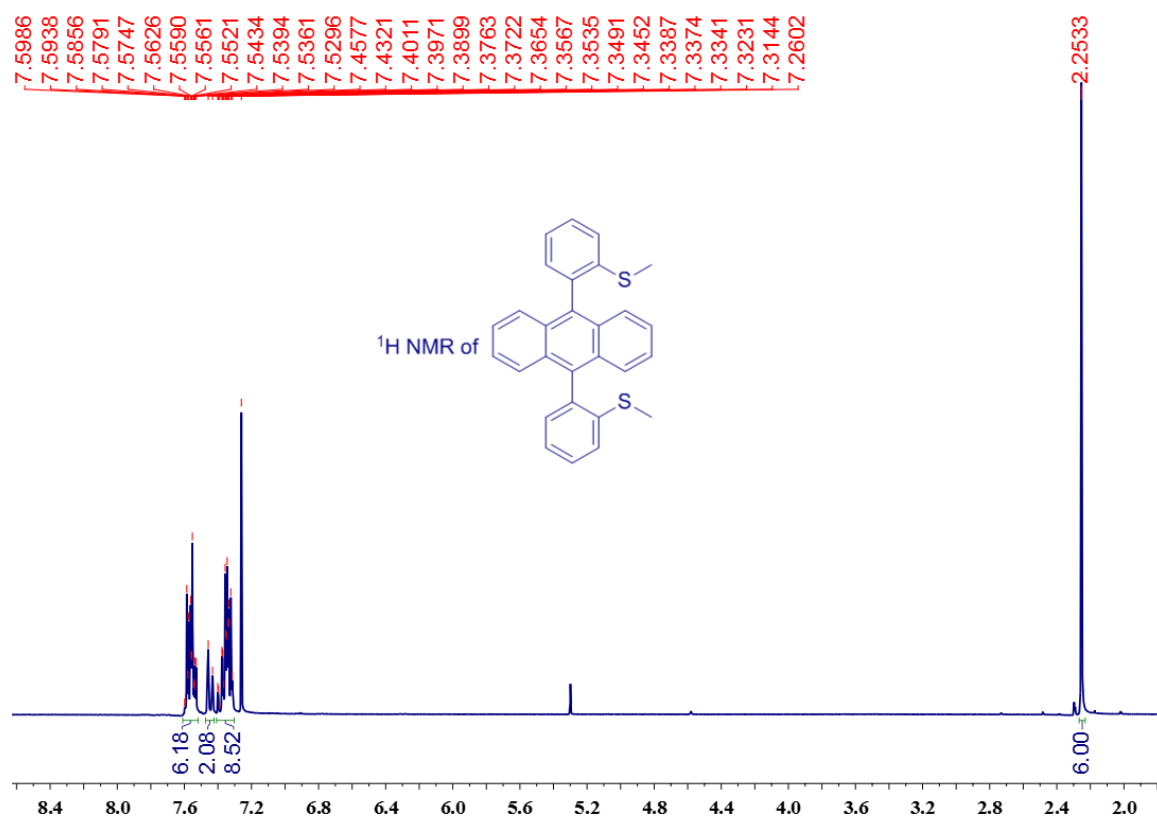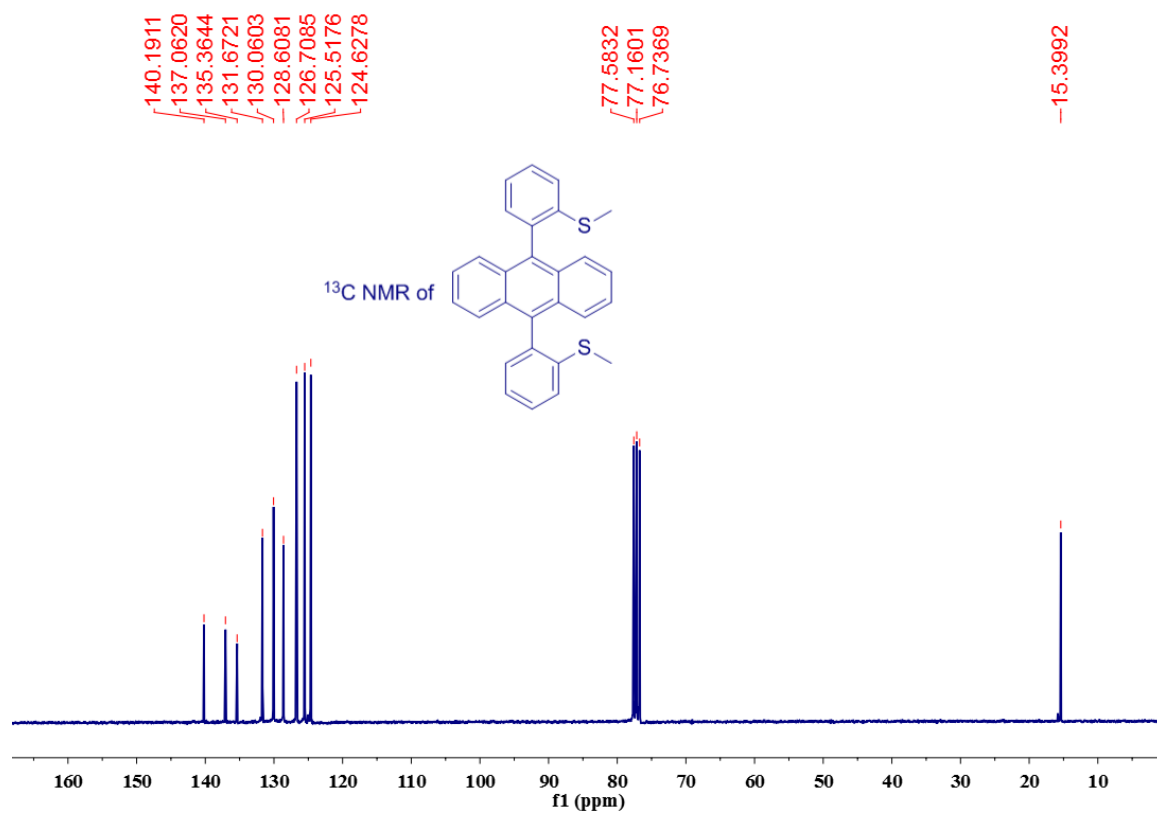

# Complex 1a

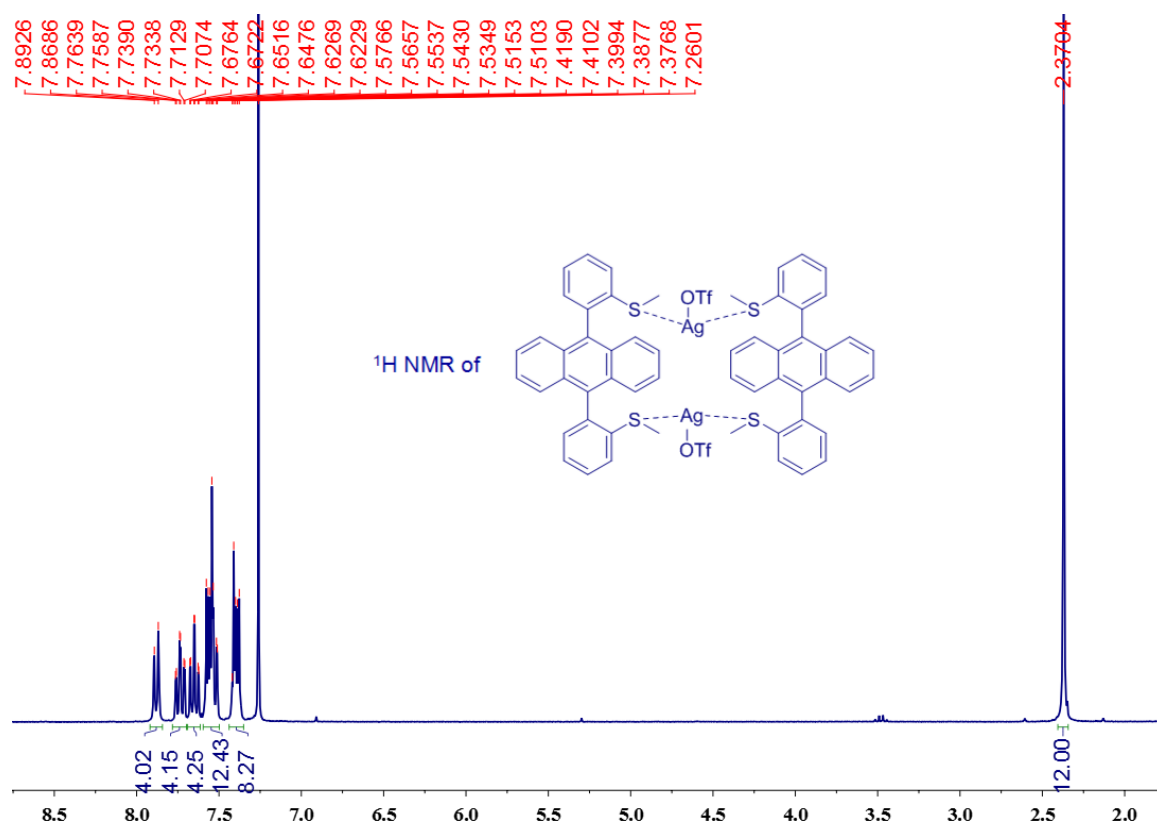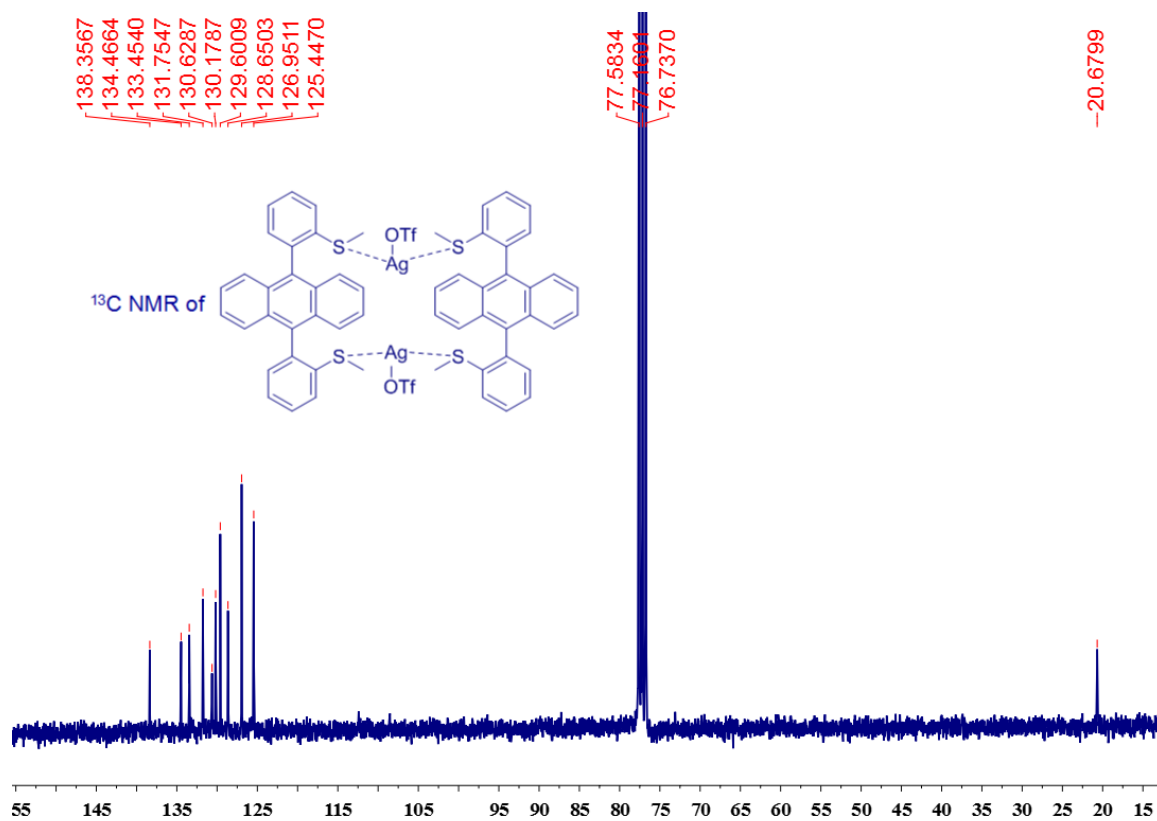

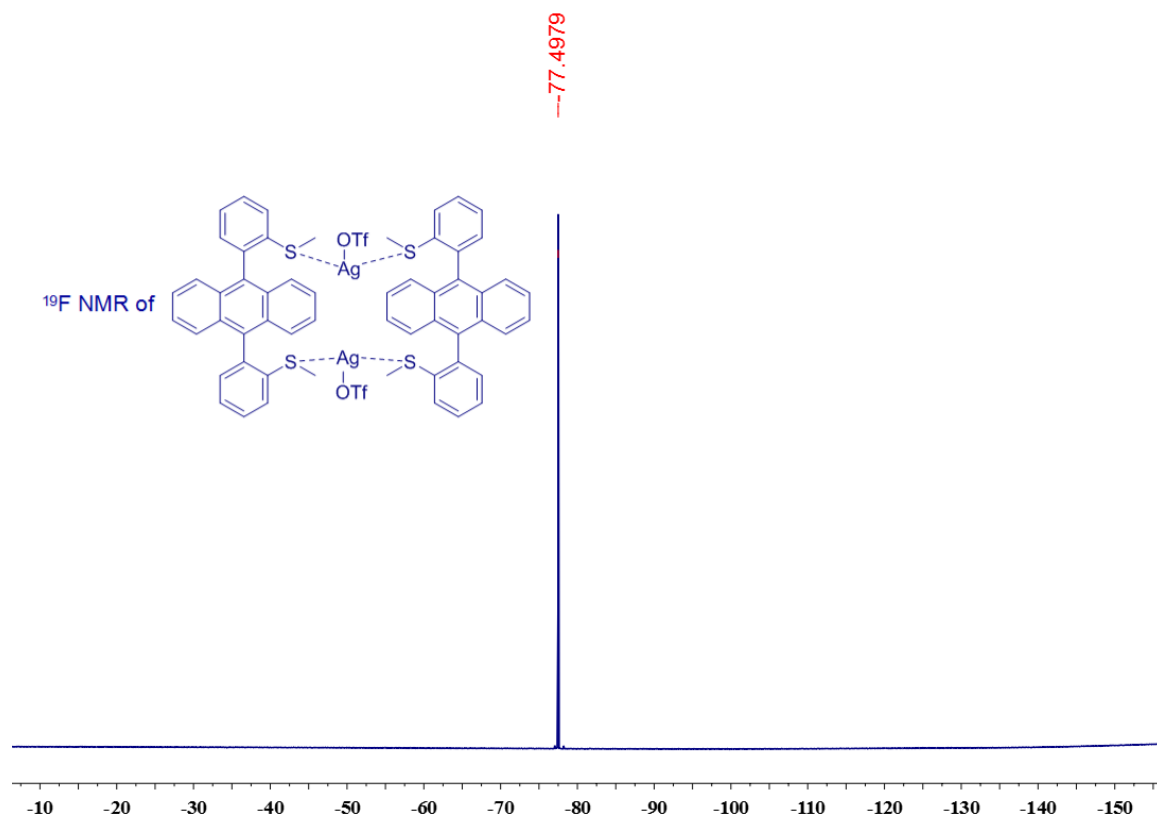

## Complex 1b

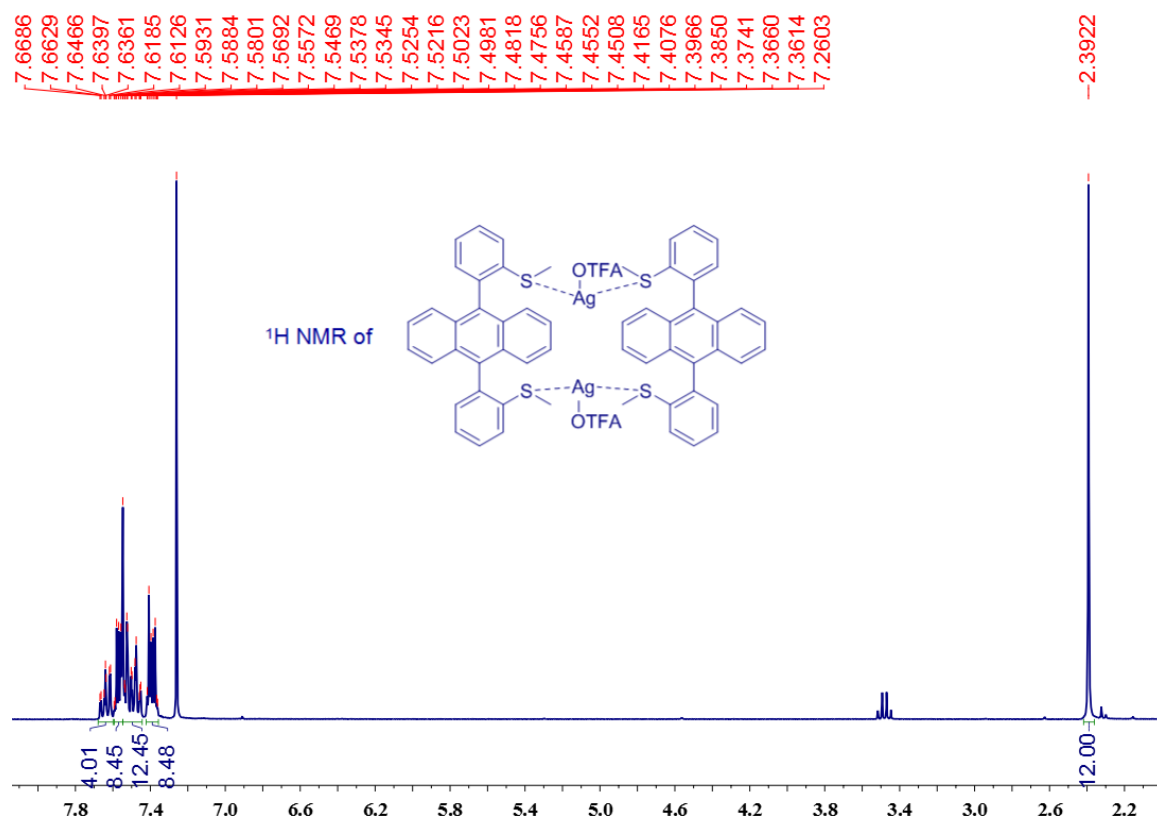

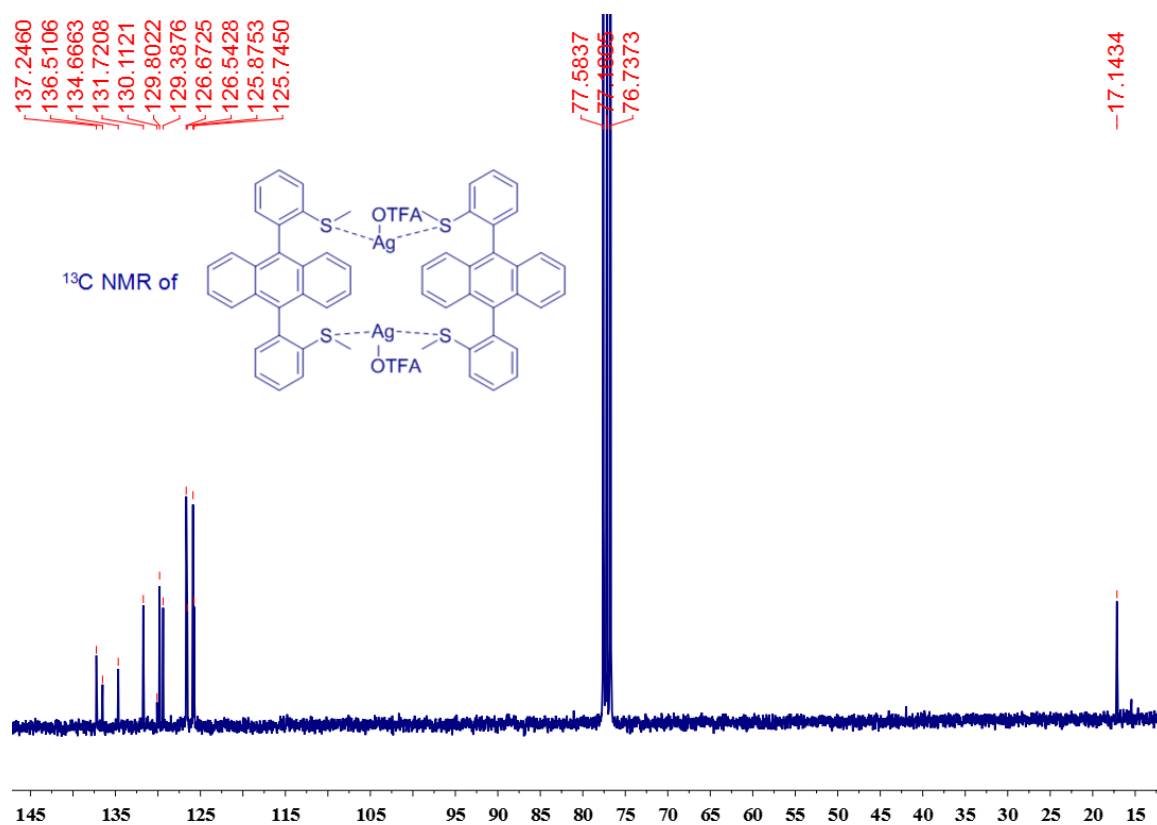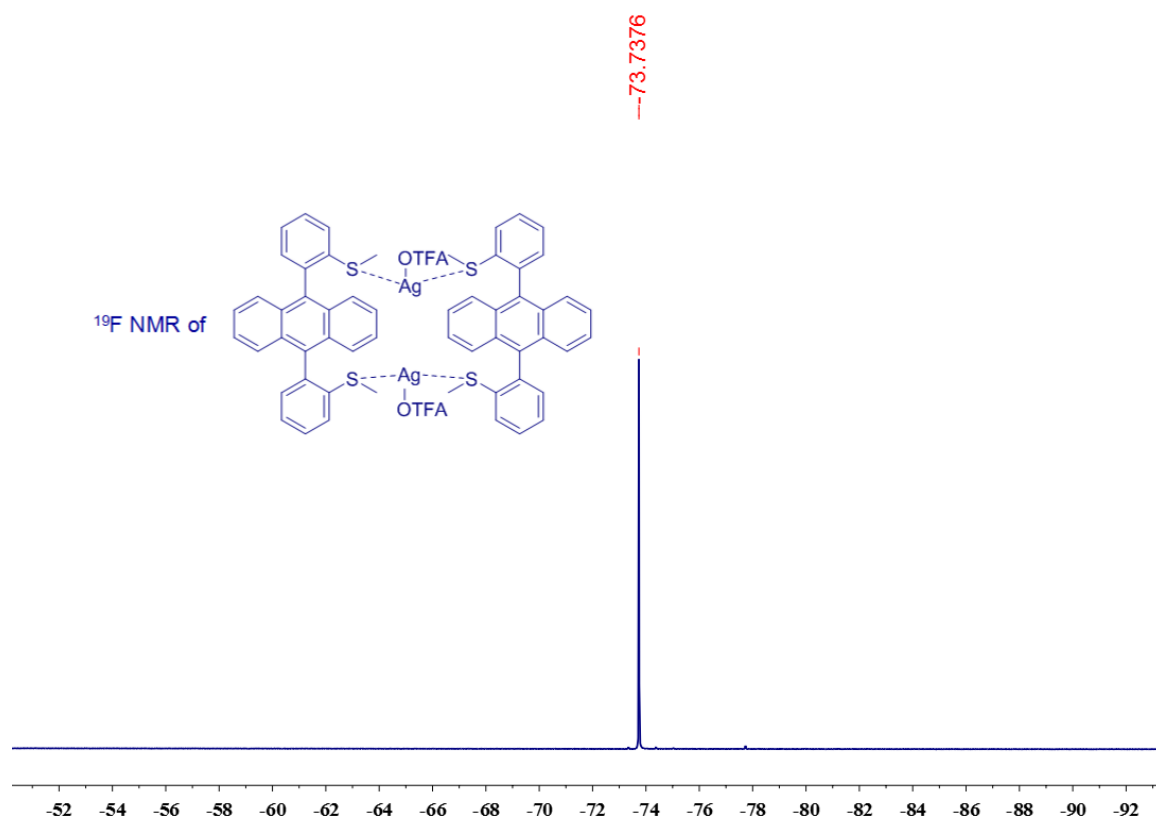

# Complex 1c

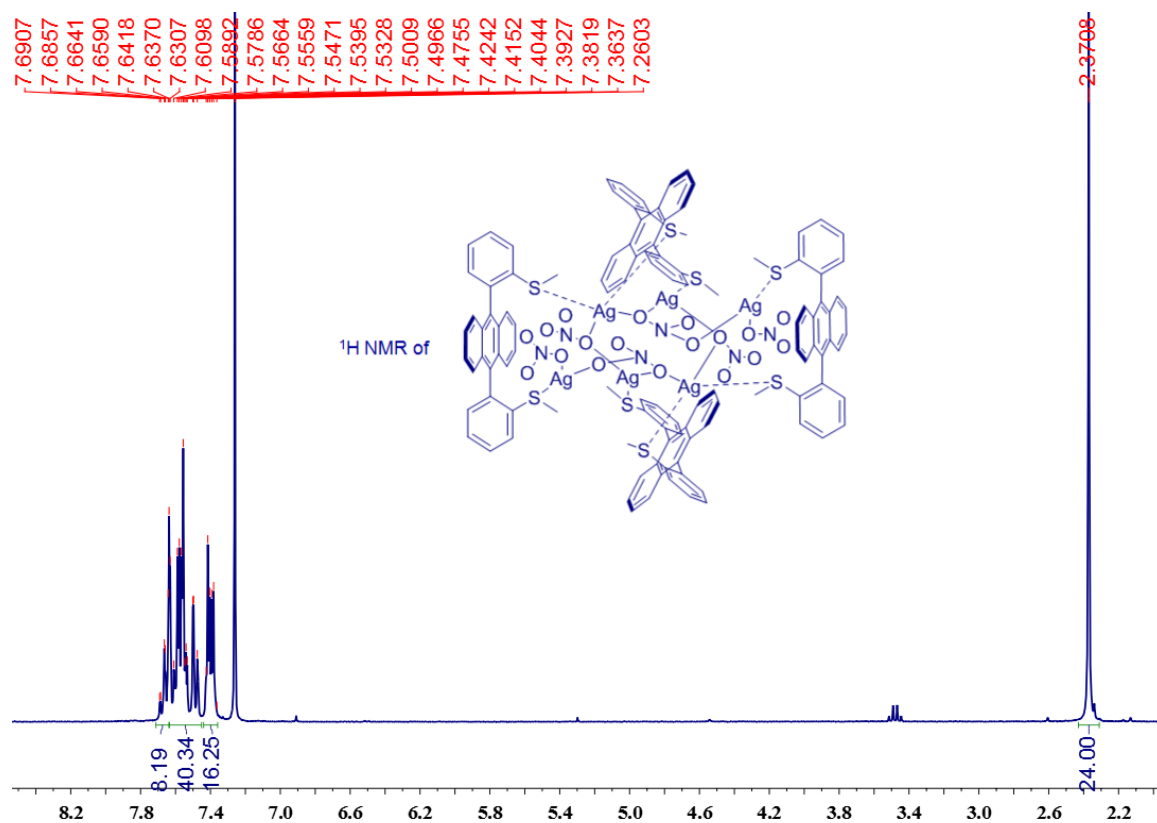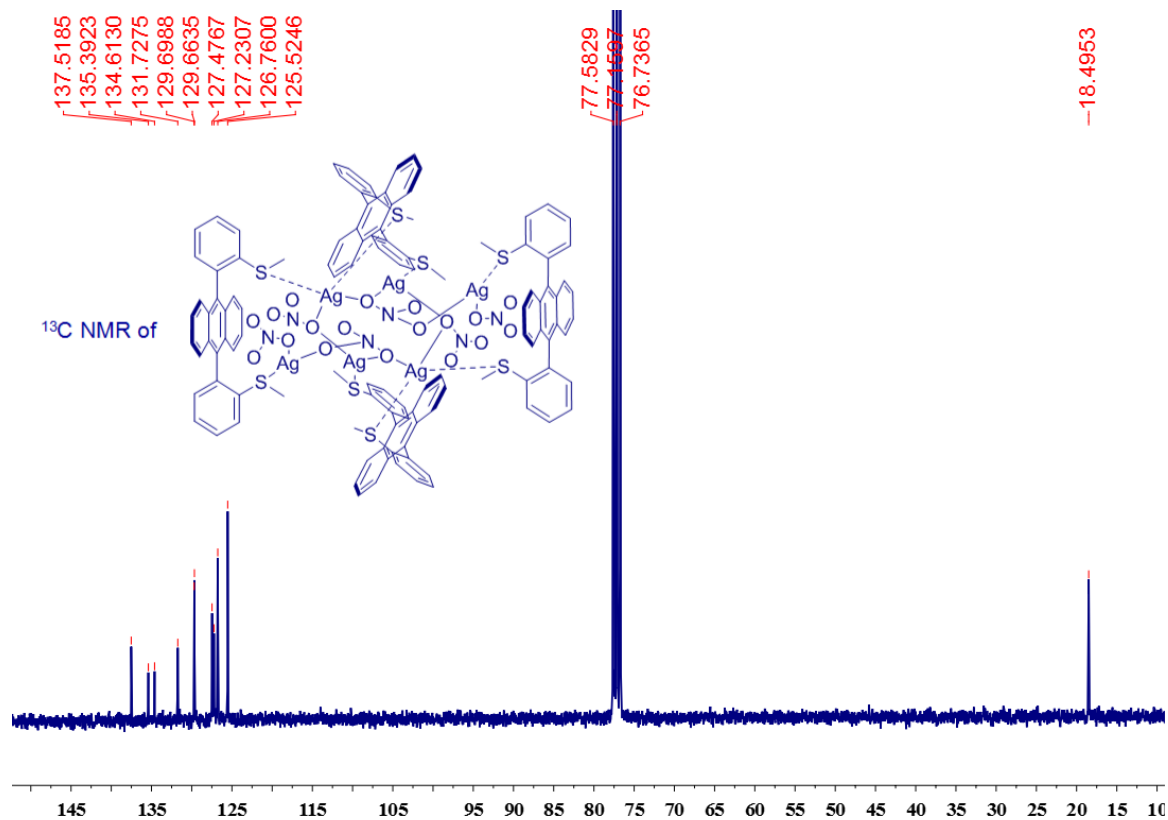

# Complex 1d

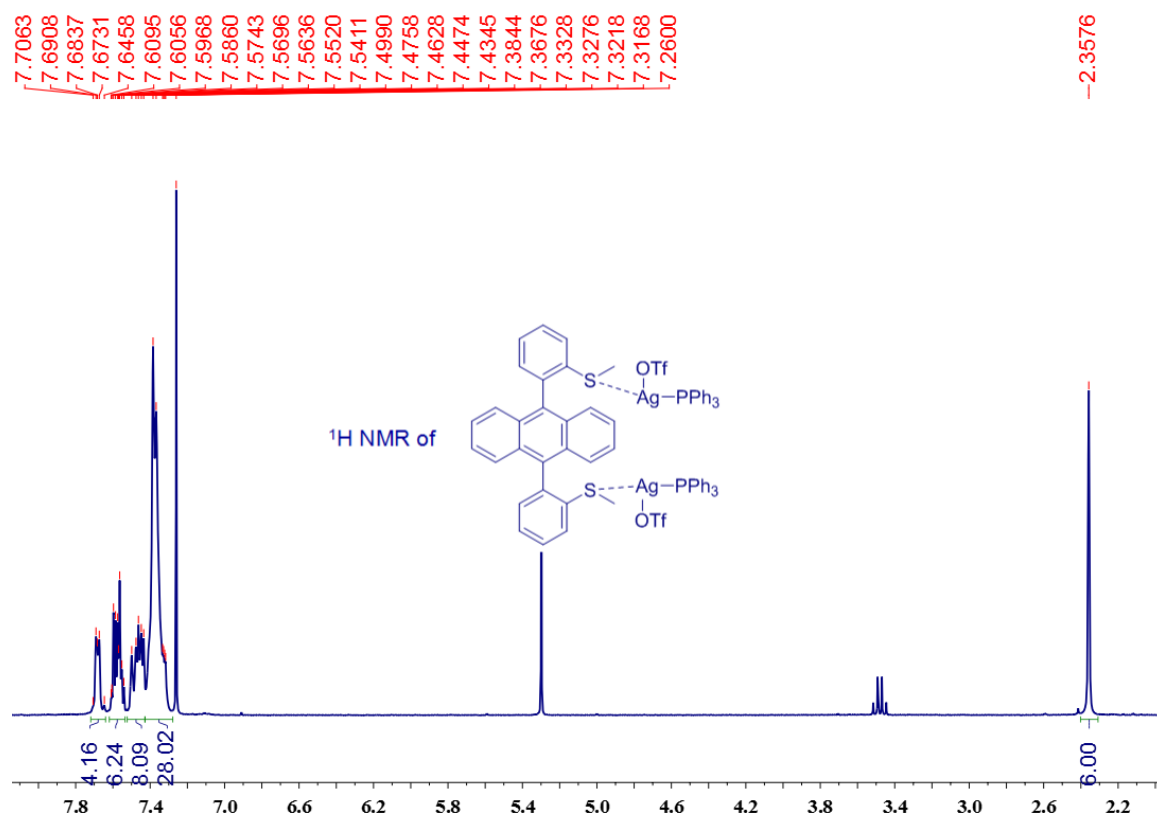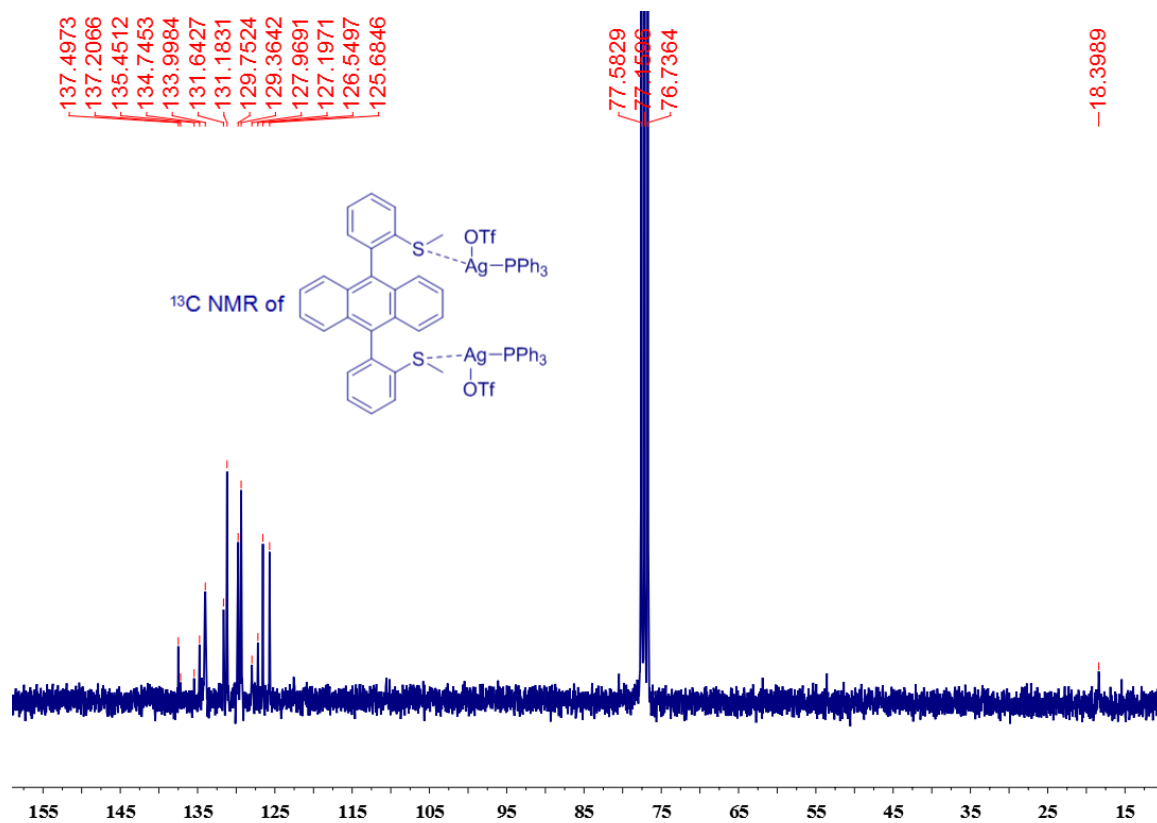



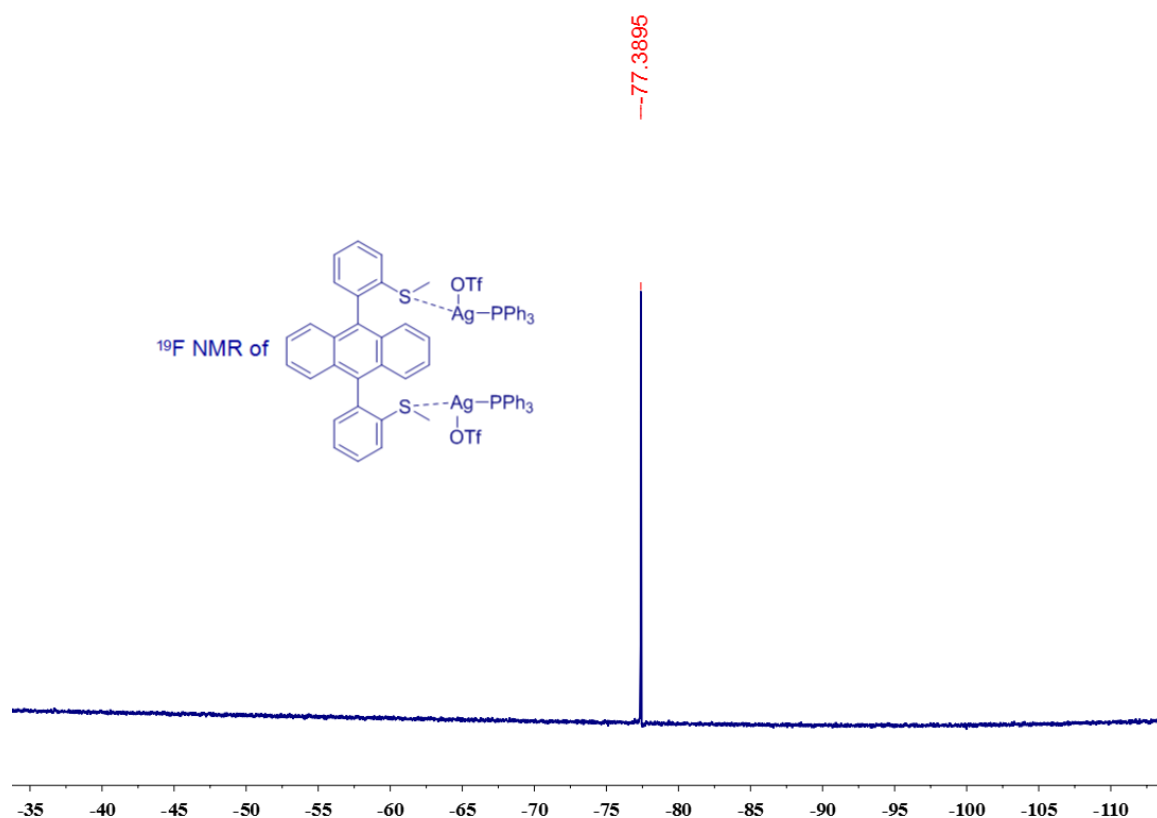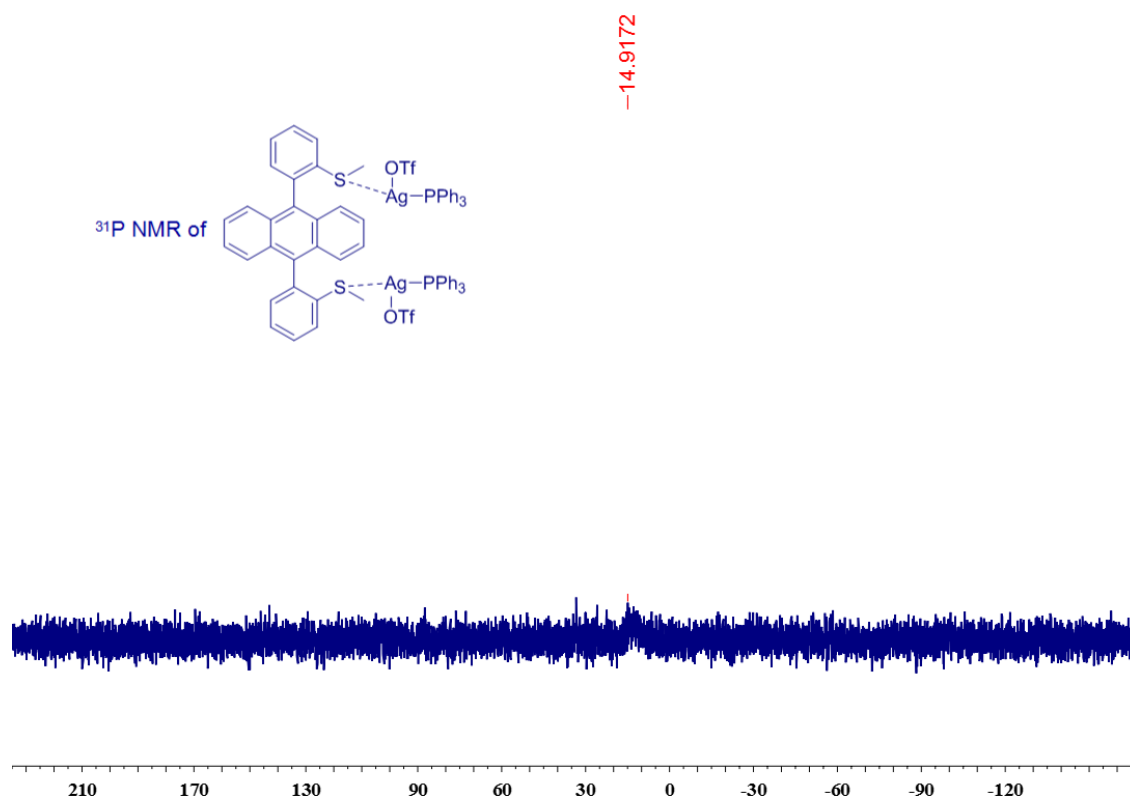

A rapid coordination/decoordination of triphenylphosphine on silver(I) on the NMR time scale may account for the absence of sharp signals on the <sup>31</sup>P NMR spectrum. Such dynamic processes were previously described for silver(I)-phosphine complexes in solution.<sup>[8]</sup>

## 2D NMR spectra of silver complexes

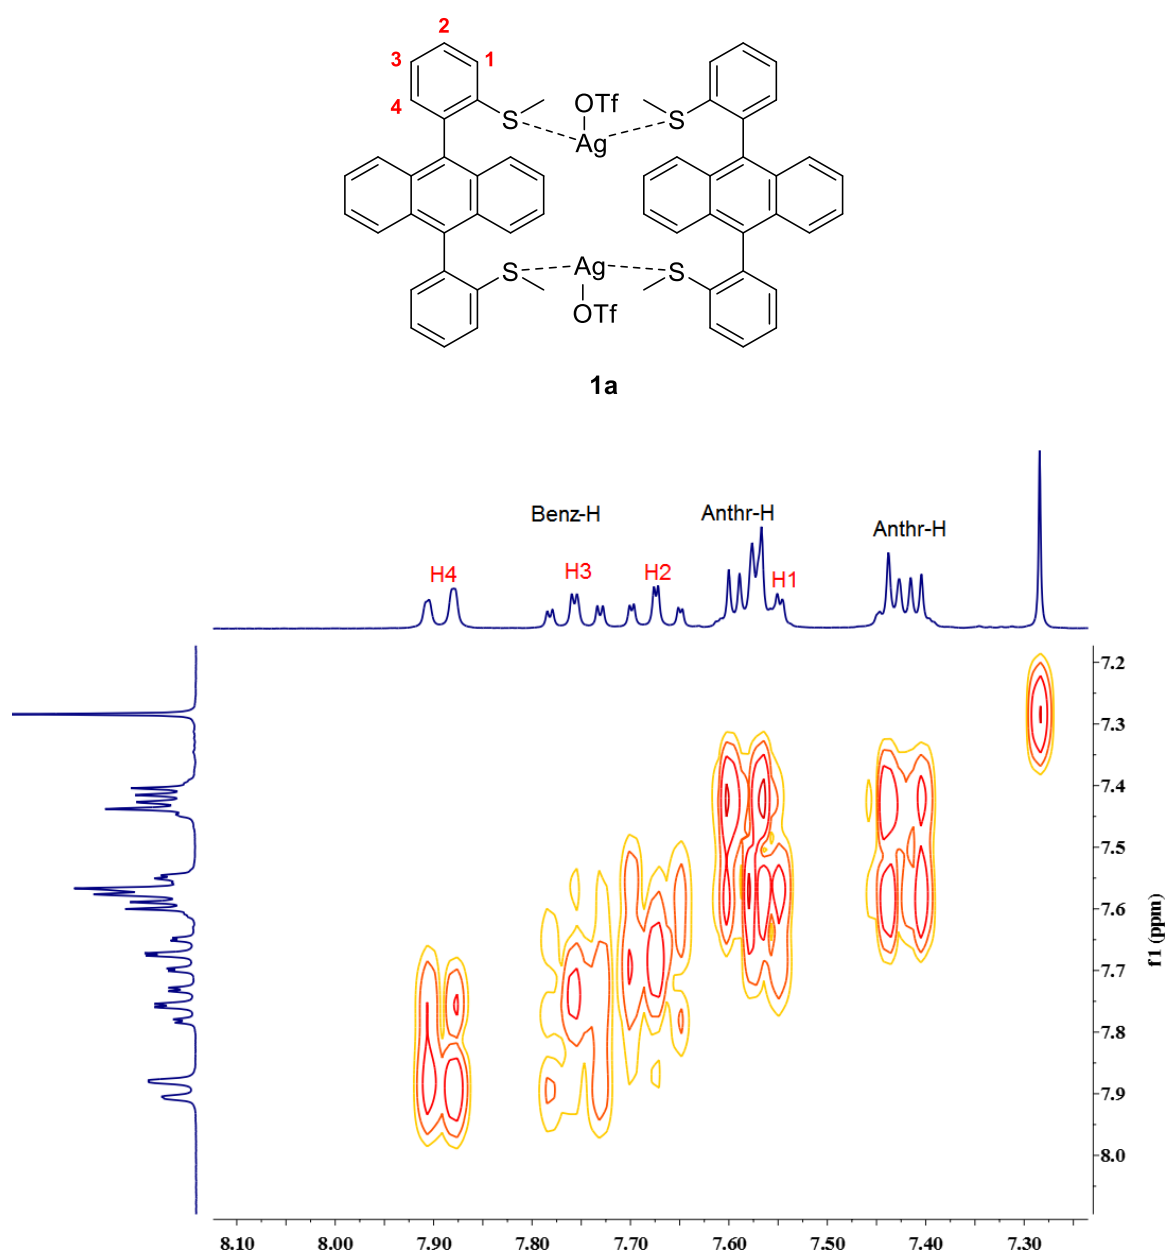

**Figure S22.**  $^1\text{H}$ - $^1\text{H}$  gCOSY NMR spectrum of complex **1a**.

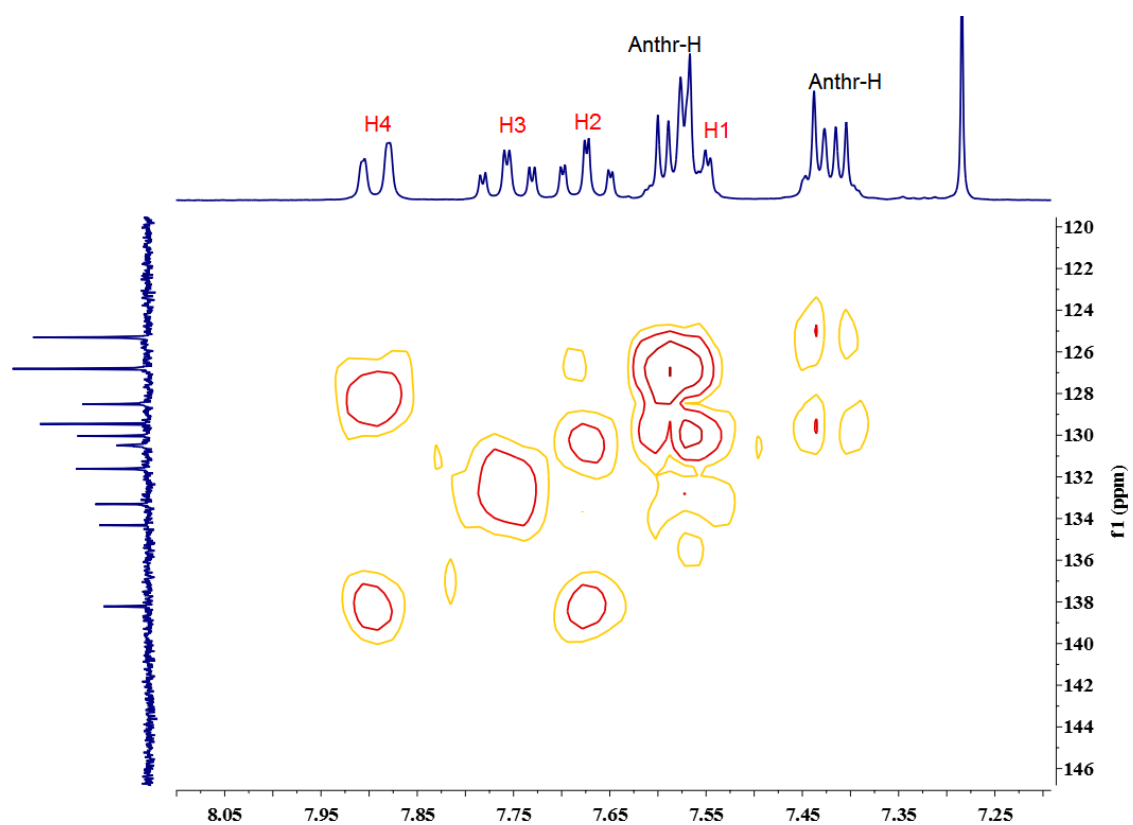

**Figure S23.**  $^1\text{H}$ - $^{13}\text{C}$  HSQC NMR spectrum of complex **1a**.

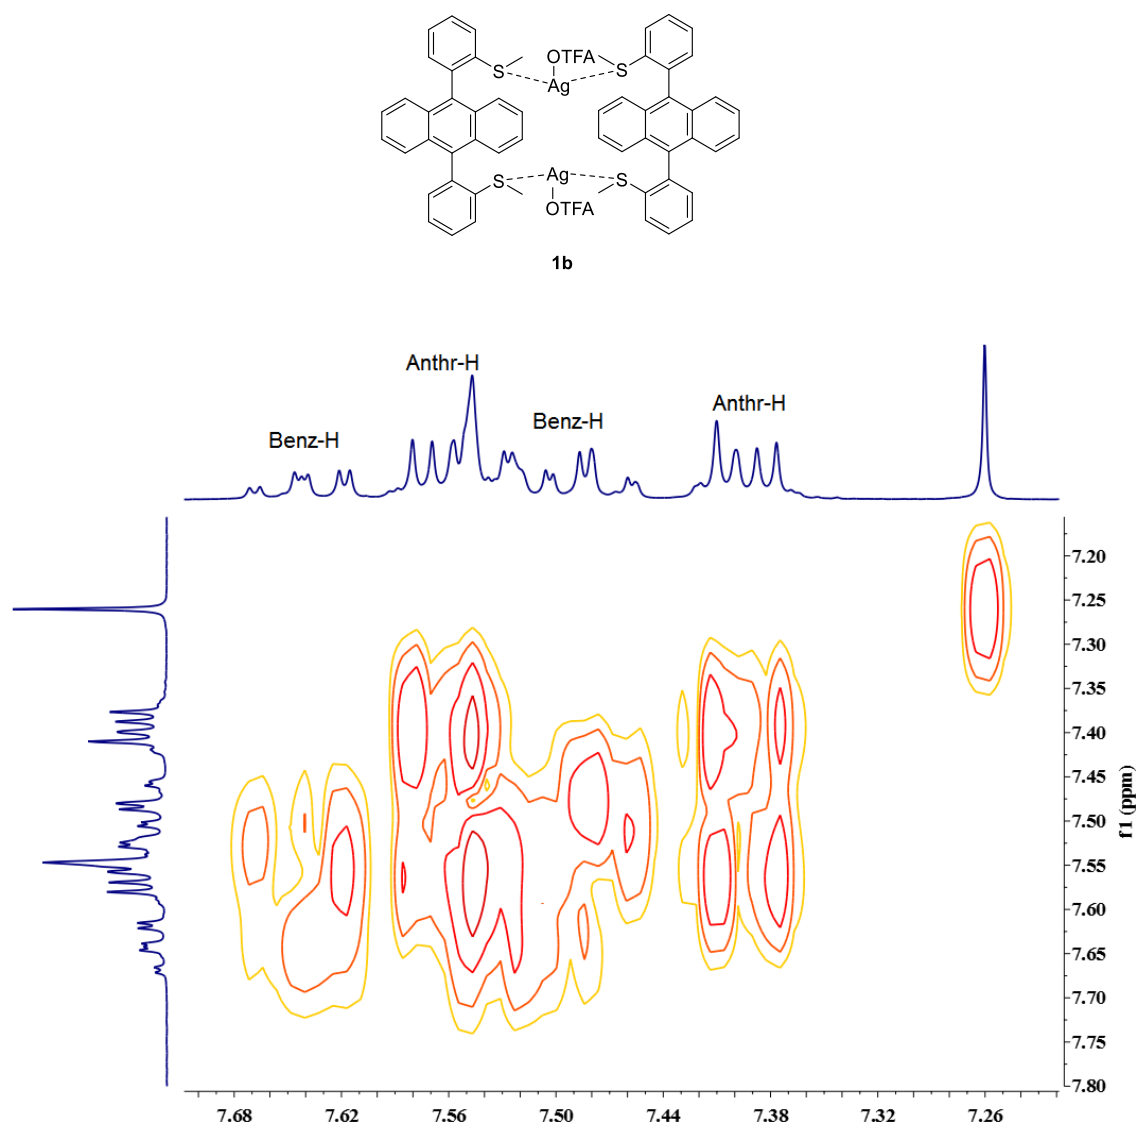

**Figure S24.**  $^1\text{H}$ - $^1\text{H}$  gCOSY NMR spectrum of complex **1b**.

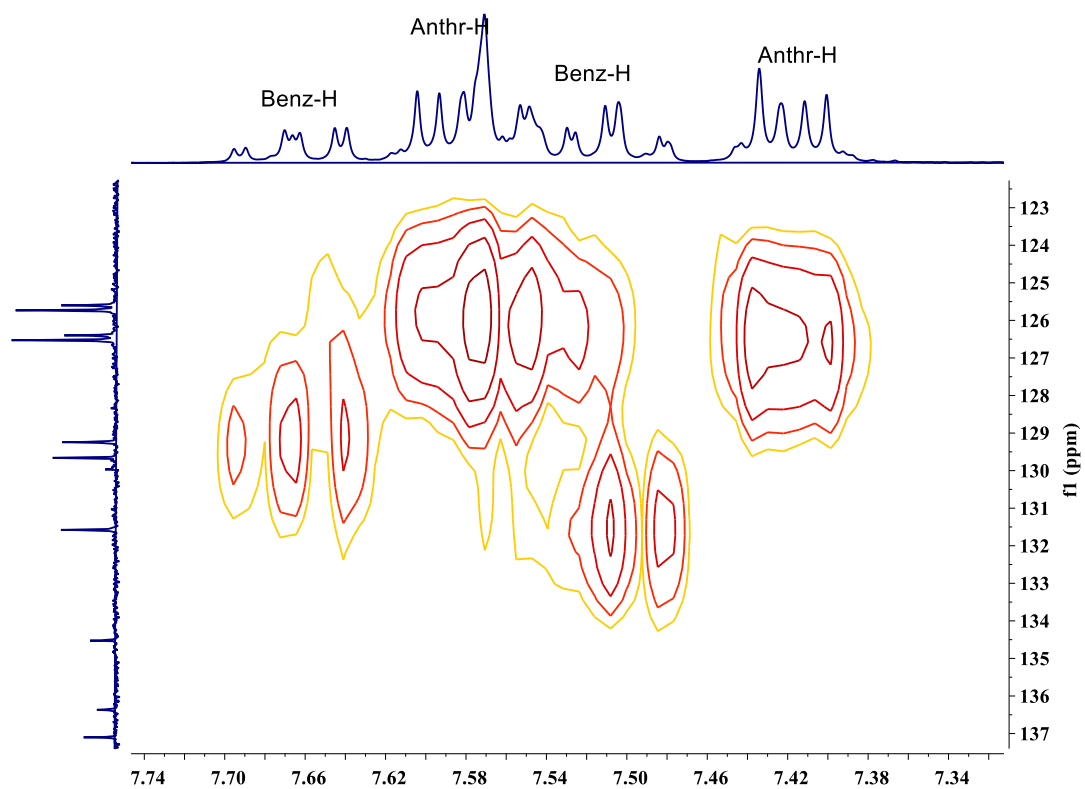

**Figure S25.**  $^1\text{H}$ - $^{13}\text{C}$  HSQC NMR spectrum of complex **1b**.

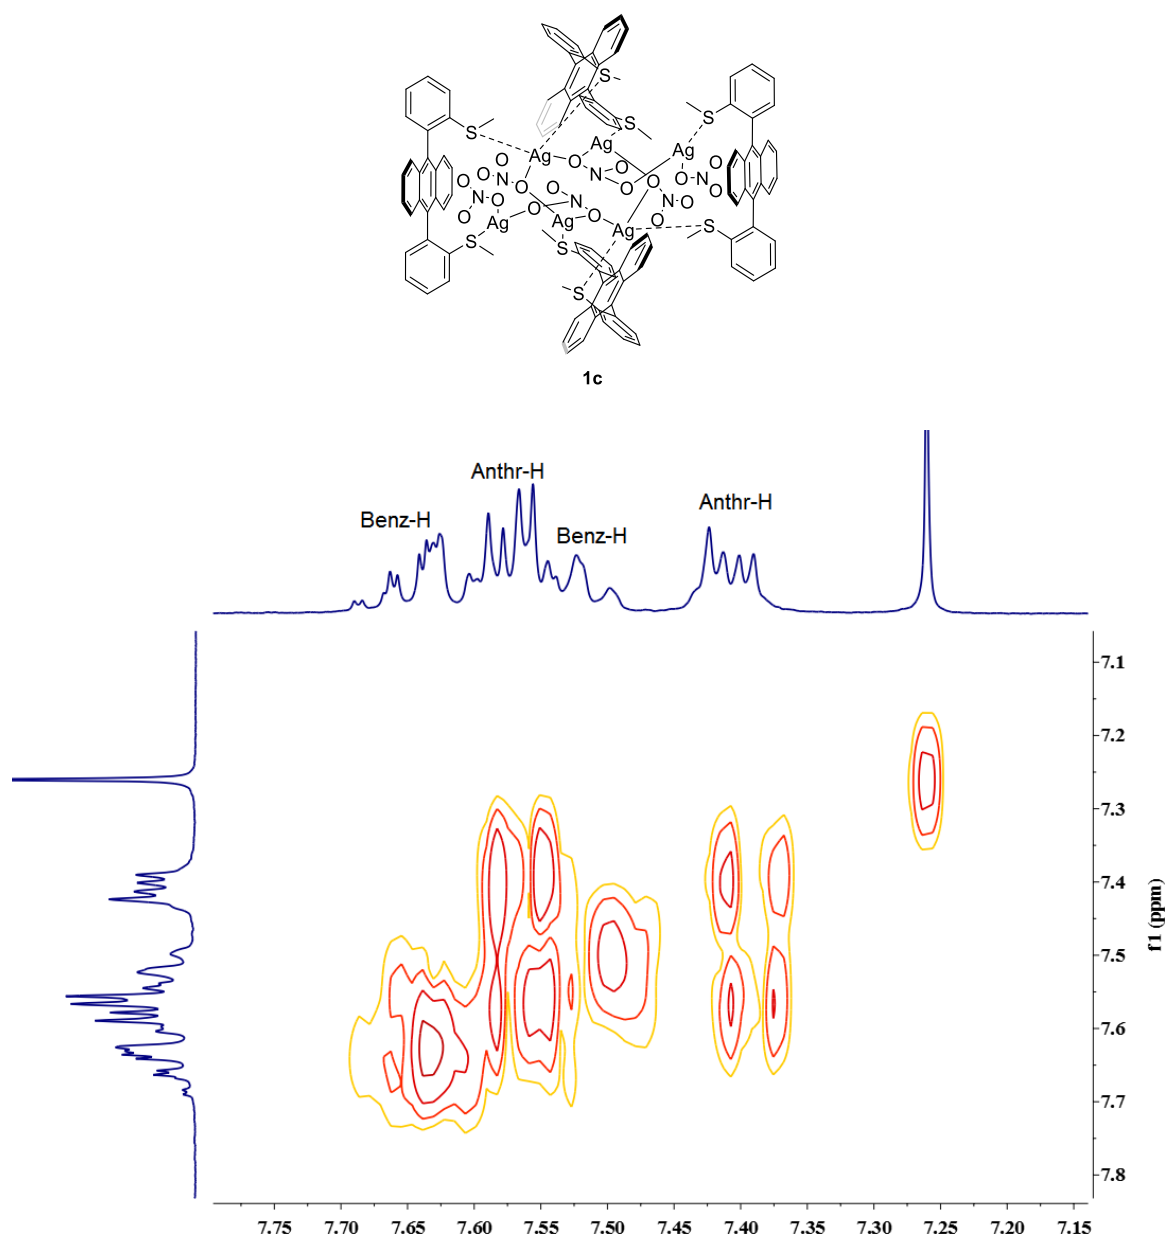

**Figure S26.**  $^1\text{H}$ - $^1\text{H}$  gCOSY NMR spectrum of complex **1c**.

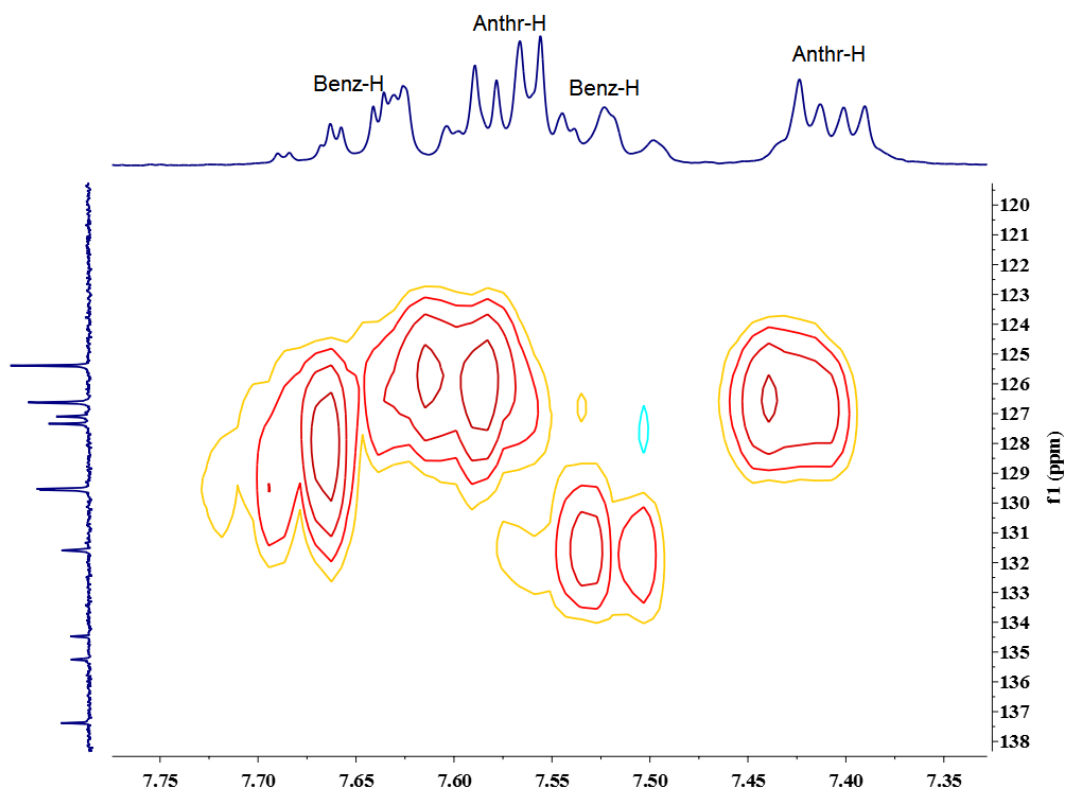

**Figure S27.**  $^1\text{H}$ - $^{13}\text{C}$  HSQC NMR spectrum of complex **1c**.

## Compound 2

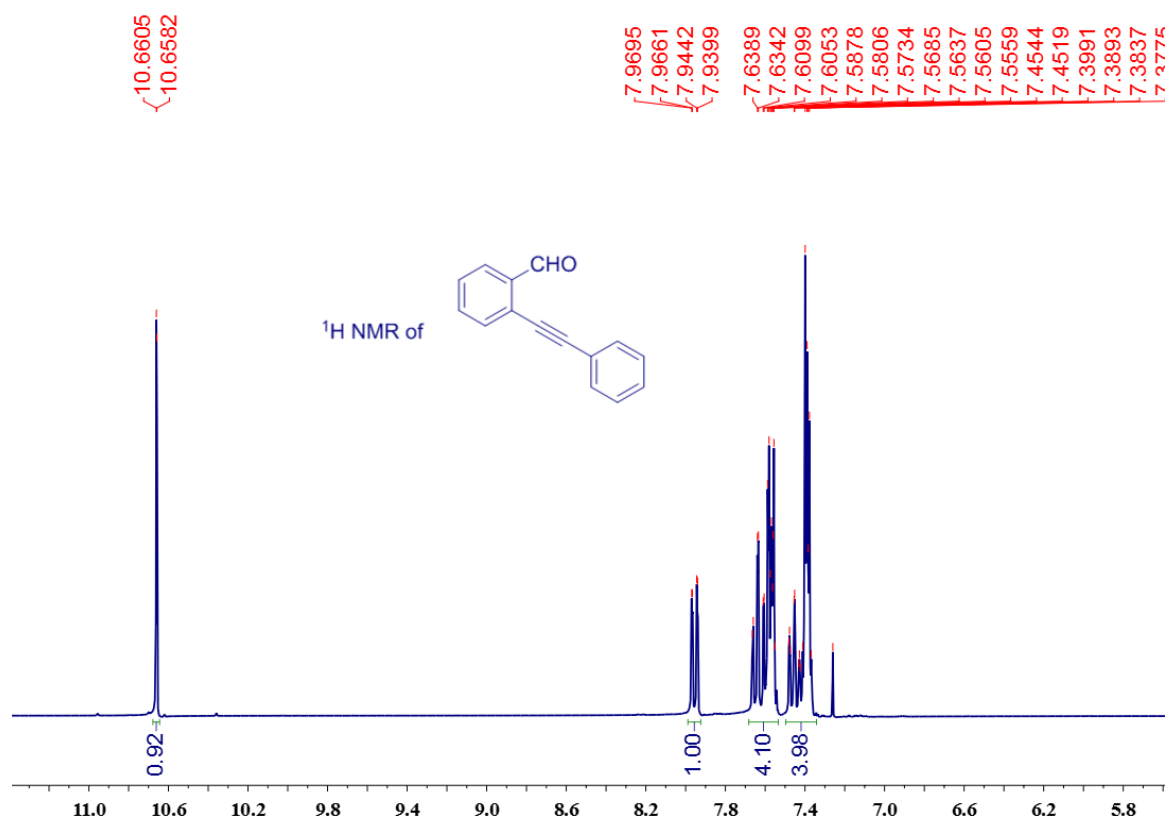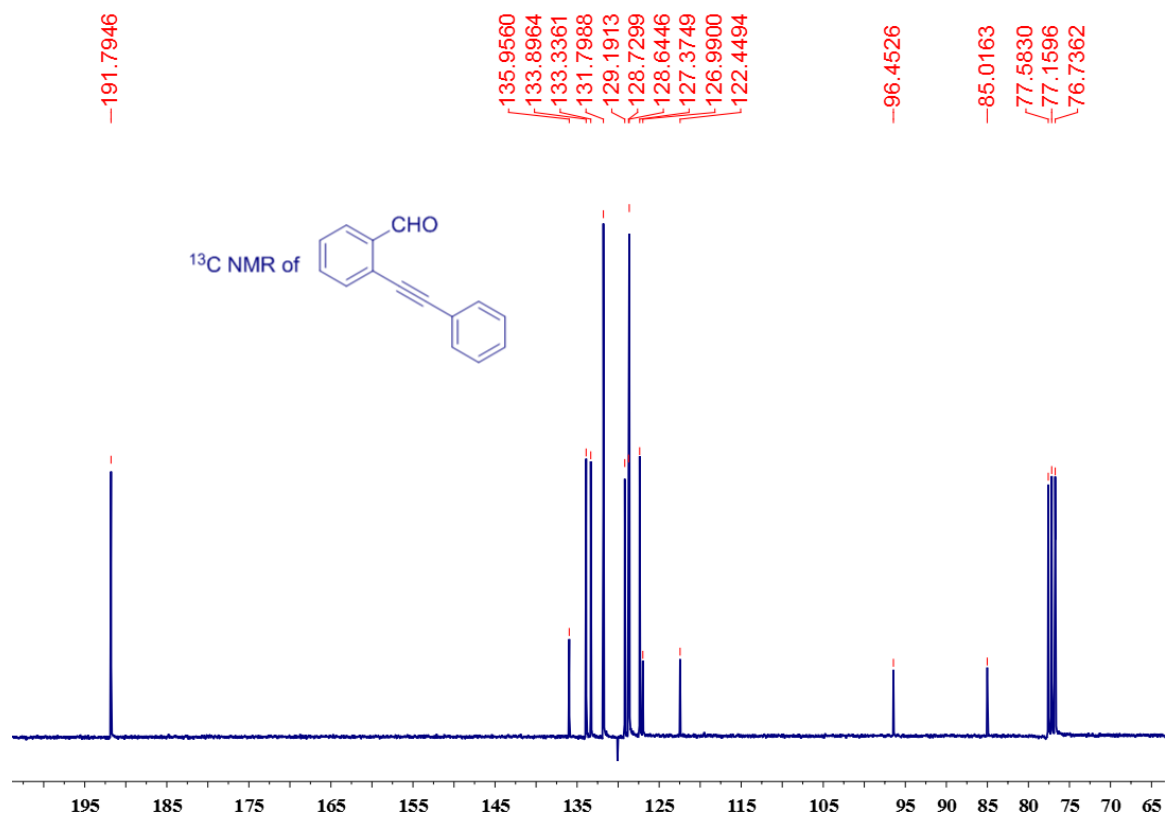



# Compound 3

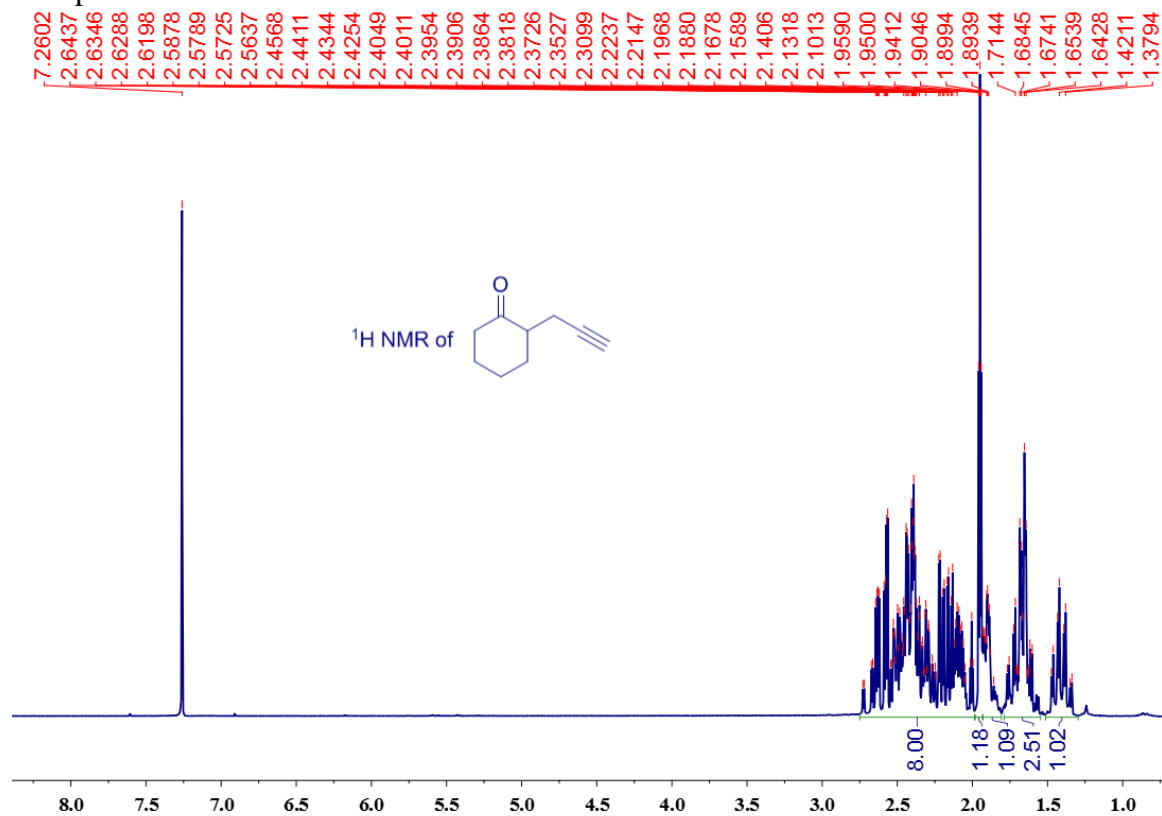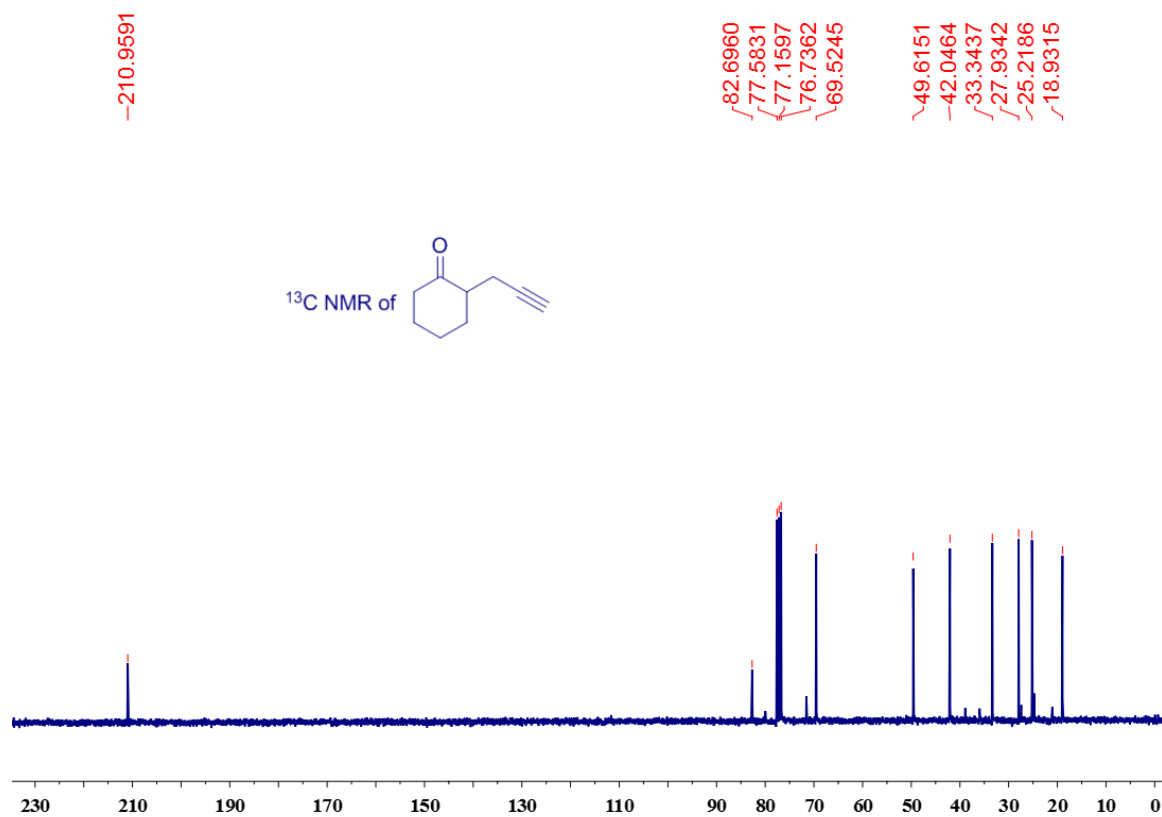

# Compound 4

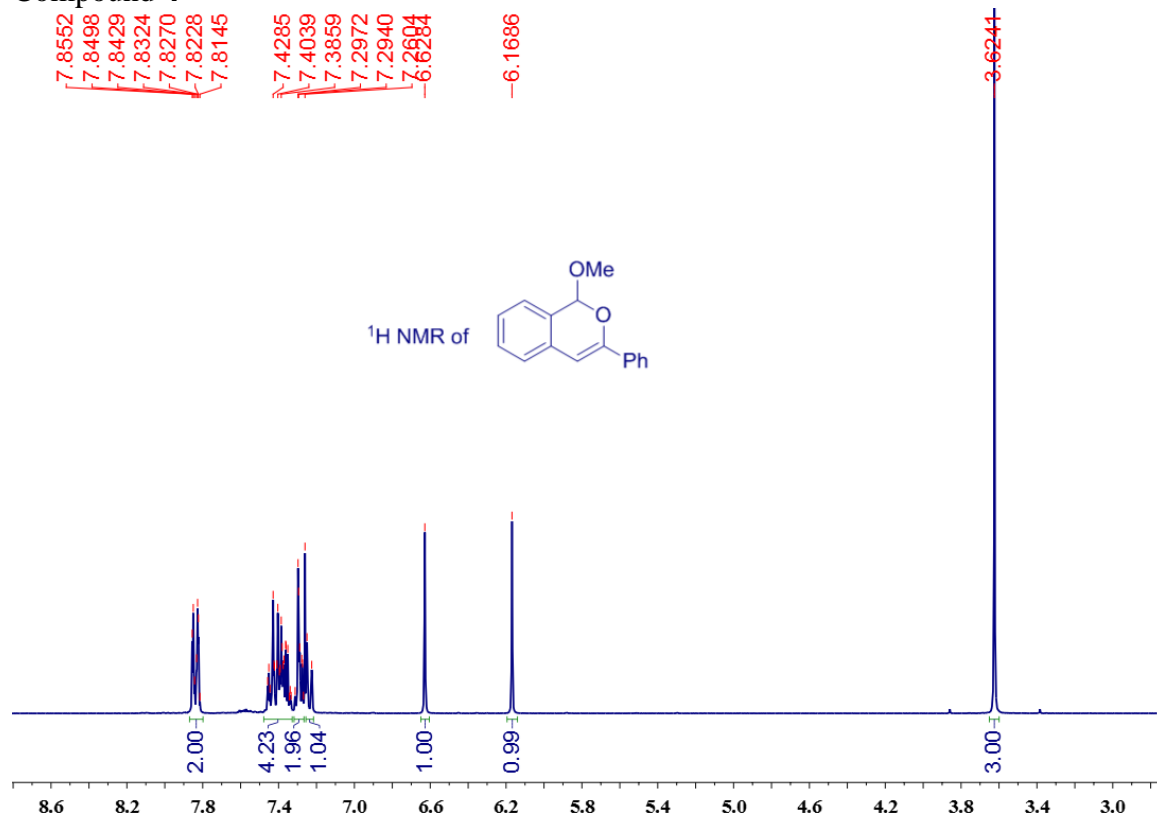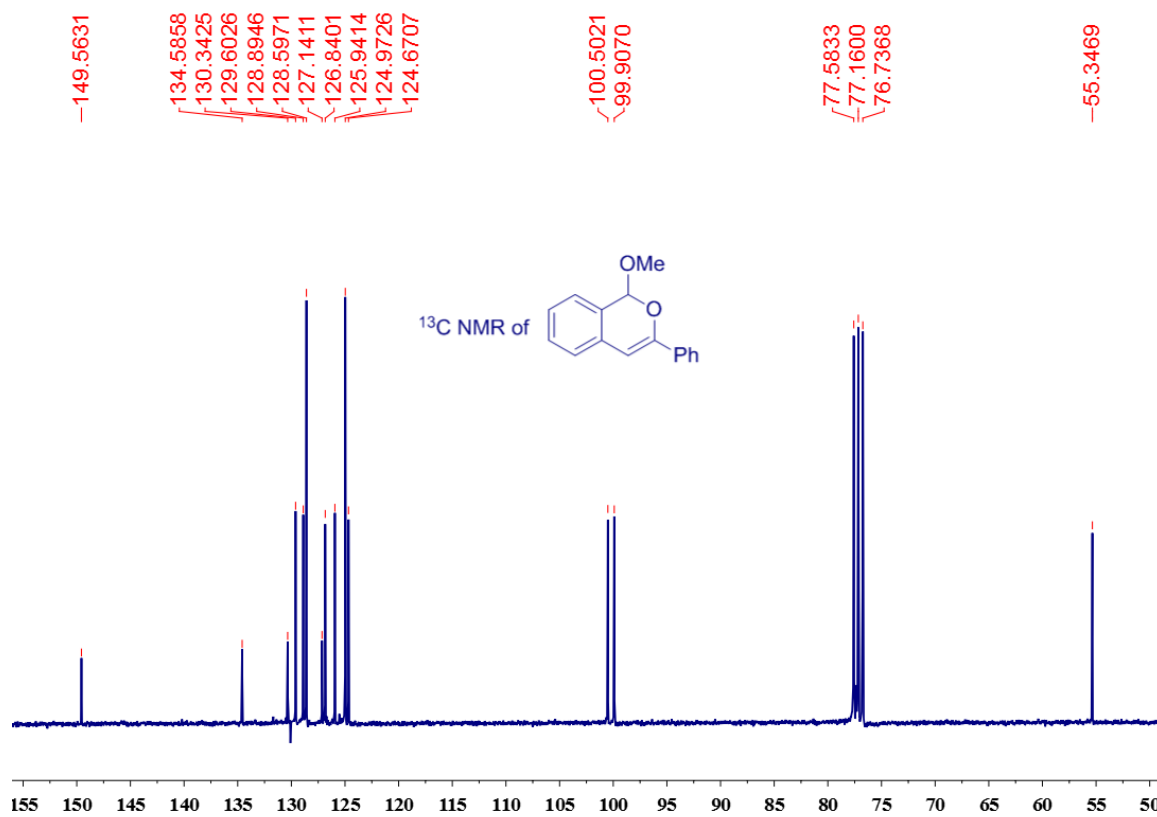

# Compound 5

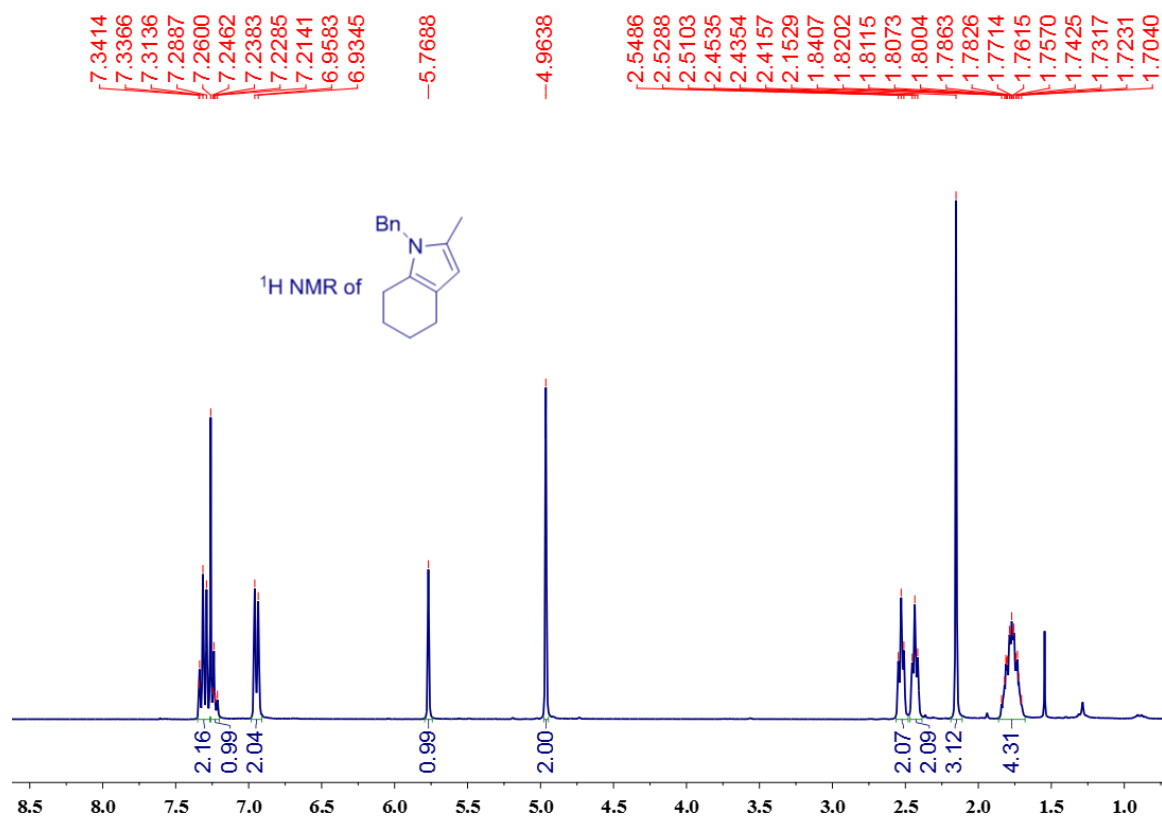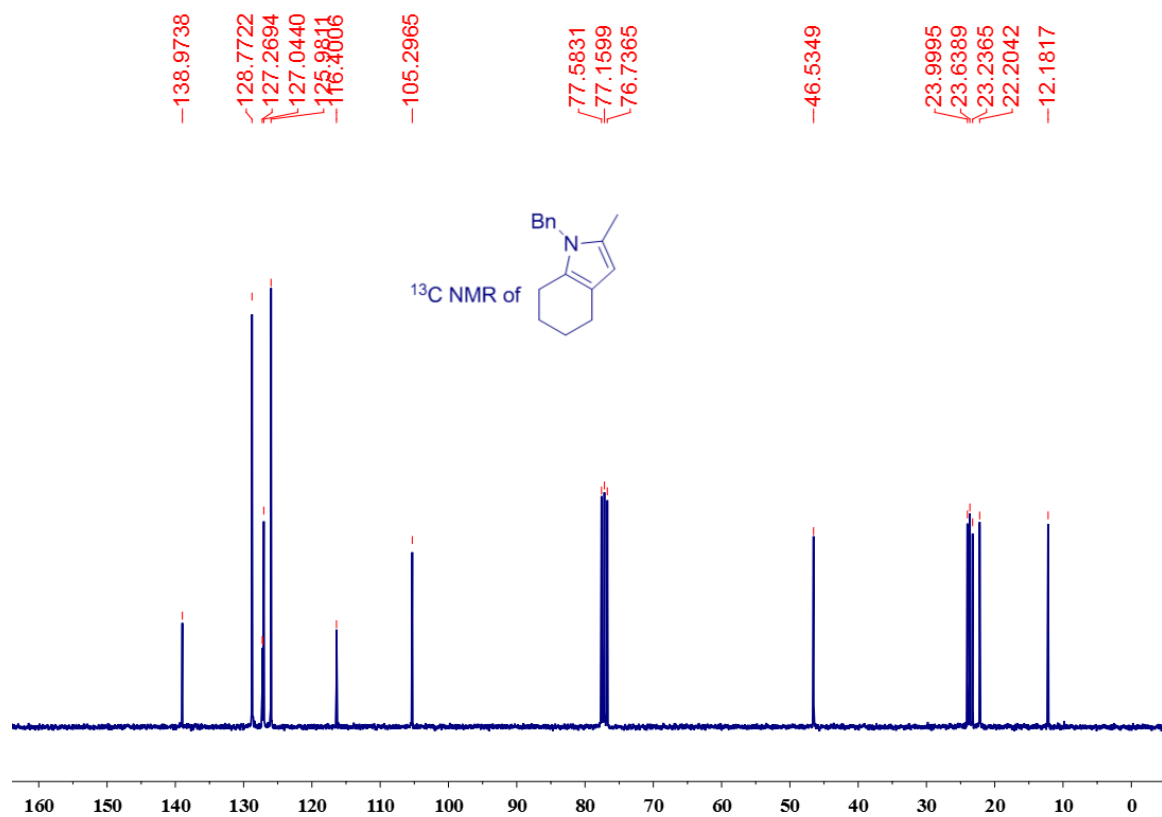

## References

- [1] Prepared from Ag<sub>2</sub>O (1g, 4.32 mmol) and trifluoacetic acid (0.58 mL, 7.84 mmol) in water at room temperature. After 12 h, the suspension was filtered. The solid was suspended in diethyl ether (20 mL) and sonicated. Charcoal was added to the suspension. After filtration, the solution was concentrated and dried to afford CF<sub>3</sub>CO<sub>2</sub>Ag (1.64 g, 95 % yield).
- [2] a) T. G. Driver, K. A. Woerpel, *J. Am. Chem. Soc.* **2004**, *126*, 9993-10002; b) A. Izaga, R. P. Herrera, M. C. Gimeno, *ChemCatChem* **2017**, *9*, 1313-1321.
- [3] a) L. Palatinus, G. Chapuis: SUPERFLIP - a computer program for the solution of crystal structures by charge flipping in arbitrary dimensions. *J. Appl. Cryst.*, **2007**, *40*, 786-790; b) L. Palatinus, S. J. Prathapa, S. Van Smaalen, *J. Appl. Cryst.* **2012**, *45*, 575–580; c) G.M. Sheldrick, *Acta Cryst. Section A*, **2008**, *64*, 112–122.
- [4] a) CrystalClear-SM Expert 2.1 (Rigaku, Jun 7th 2013) Software, Version 5.6.2.0, Tokyo, Japan; b) L. J. Farrugia, *J. Appl. Cryst.* **1999**, *32*, 837-838; c) C. F. Macrae, I. J. Bruno, J. A. Chrisholm, P. R. Edgington, P. McCabe, E. Pidcock, L. Rodriguez-Monge, R. Taylor, J. van de Streek, P. A. Wood, *J. Appl. Cryst.* **2008**, *41*, 466-470.
- [5] a) T. Sakamoto, Y. Kondo, N. Miura, K. Hayashi, H. Yamanaka, *Heterocycles*. **1986**, *24*, 2311-2314; b) G. Dyker, W. Stirner, G. Henkel, *Eur. J. Org. Chem.* **2000**, 1433-1441.
- [6] (a) B. M. Trost, M. T. Rudd, *J. Am. Chem. Soc.* **2005**, *127*, 4763-4776; (b) T. J. Harrison, J. A. Kozak, M. Corbella-Pane, G. R. Dake, *J. Org. Chem.* **2006**, *71*, 4525-4529.
- [7] a) T. Godet, C. Vaxelaire, C. Michel, A. Milet, P. Belmont, *Chem. Eur. J.* **2007**, *13*, 5632-5641; b) E. Parker, N. Leconte, T. Godet, P. Belmont, *Chem. Commun.* **2011**, *47*, 343-345; c) M. Dell'Acqua, B. Castano, C. Cecchini, T. Pedrazzini, V. Pirovano, E. Rossi, A. Caselli, G. Abbiati, *J. Org. Chem.* **2014**, *79*, 3494-3505.
- [8] a) U. Létinois-Haldes, P. Pale, S. Berger, *Magn. Reson. Chem.* **2004**, *42*, 831-834; b) G. A. Bowmaker, C. Di Nicola, Effendy, J. V. Hanna, P. C. Healy, S. P. King, F. Marchetti, C. Pettinari, W. T. Robinson, B. W. Skelton, A. N. Sobolev, A. Tabacaru, A. H. White, *Dalton Trans.* **2013**, *42*, 277-291.
